# Supplementary material for: Metabolite annotation from knowns to unknowns through knowledge-guided multi-layer metabolic networking
Source: PubMed Central journal article supplement (PMC9636193; doi:10.1038/s41467-022-34537-6), 2022-11-04
Supplement: 41467_2022_34537_MOESM1_ESM.pdf [file 41467_2022_34537_MOESM1_ESM.pdf]

***Supplementary information for***

**Metabolite annotation from knowns to unknowns through  
knowledge-guided multi-layer metabolic networking**

*Zhiwei Zhou<sup>1,†</sup>, Mingdu Luo<sup>1,2,†</sup>, Haosong Zhang<sup>1,2</sup>, Yandong Yin<sup>1</sup>, Yuping Cai<sup>1</sup>,  
and Zheng-Jiang Zhu<sup>1,3,\*</sup>*

<sup>1</sup> Interdisciplinary Research Center on Biology and Chemistry, Shanghai Institute of Organic Chemistry, Chinese Academy of Sciences, Shanghai, 200032 China

<sup>2</sup> University of Chinese Academy of Sciences, Beijing, 100049 China

<sup>3</sup> Shanghai Key Laboratory of Aging Studies, Shanghai, 201210 China

<sup>†</sup> These authors contributed equally

**Corresponding Author**

Correspondence should be addressed to Z.J.Z (jiangzhu@sioc.ac.cn)

## **List for Supplementary Figures**

**Supplementary Figure 1.** Curation of knowledge-based metabolic reaction network (KMRN) with *in-silico* enzymatic reactions.

**Supplementary Figure 2.** Statistics of linked nodes in MS/MS similarity network or knowledge-guided MS/MS similarity network.

**Supplementary Figure 3.** The construction and optimization of global peak annotation network.

**Supplementary Figure 4.** Flowchart for the optimization and filtering of subnetworks in the global peak correlation network.

**Supplementary Figure 5.** The workflow of accuracy evaluation with a manually curated data set.

**Supplementary Figure 6.** Comparison between MetDNA1 and KGMN in different biological samples, including NIST human urine, NIST human plasma, BV2 cells, head tissues of fruit fly, and 200STD spiked mouse liver tissues.

**Supplementary Figure 7.** Benchmark comparison between CAMERA and KGMN for annotating ion forms of metabolic peaks.

**Supplementary Figure 8.** KGMN recognized the in-source fragments of N4-Acetylcytidine.

**Supplementary Figure 9.** Examples of different ion form recognition and peak assignment in KGMN.

**Supplementary Figure 10.** Knowledge-guided multi-layer networks of 46std\_mix data sets.

**Supplementary Figure 11.** Validation examples of annotated unknowns in 46std\_mix data sets.

**Supplementary Figure 12.** Knowledge-guided MS/MS similarity network of NIST human urine sample.

**Supplementary Figure 13.** Global peak correlation network of NIST human urine sample.

**Supplementary Figure 14.** Global annotation of unknown metabolites in negative mode and validation examples of unknowns using *in-silico* MS/MS tools.

**Supplementary Figure 15.** The repository-mining and structural validations of 3 recurrent unknown metabolites.

**Supplementary Figure 16.** Curated unknown metabolites and reaction pairs in the knowledge-based metabolic reaction network (KMRN).

## **List for Supplementary Table**

**Supplementary Table 1.** The supported data processing tools with KGMN

**Supplementary Table 2.** Statistics of global peak annotation optimization to improve annotation accuracy.

**Supplementary Table 3.** Statistics of biotransformation types in 46std\_mix data set.

**Supplementary Table 4.** Statistics of annotated peaks in different biological samples.

**Supplementary Table 5.** Statistics of unknown biotransformation types in NIST urine data set.

## **List for Supplementary Notes**

**Supplementary Note 1:** Tutorial of KGMN result visualization and analysis.

**Supplementary Note 2:** Tutorial of validating KGMN unknowns with repository mining.

**Supplementary Note 3:** Tutorial of integrating KGMN results with other in-silico MS/MS workflows.

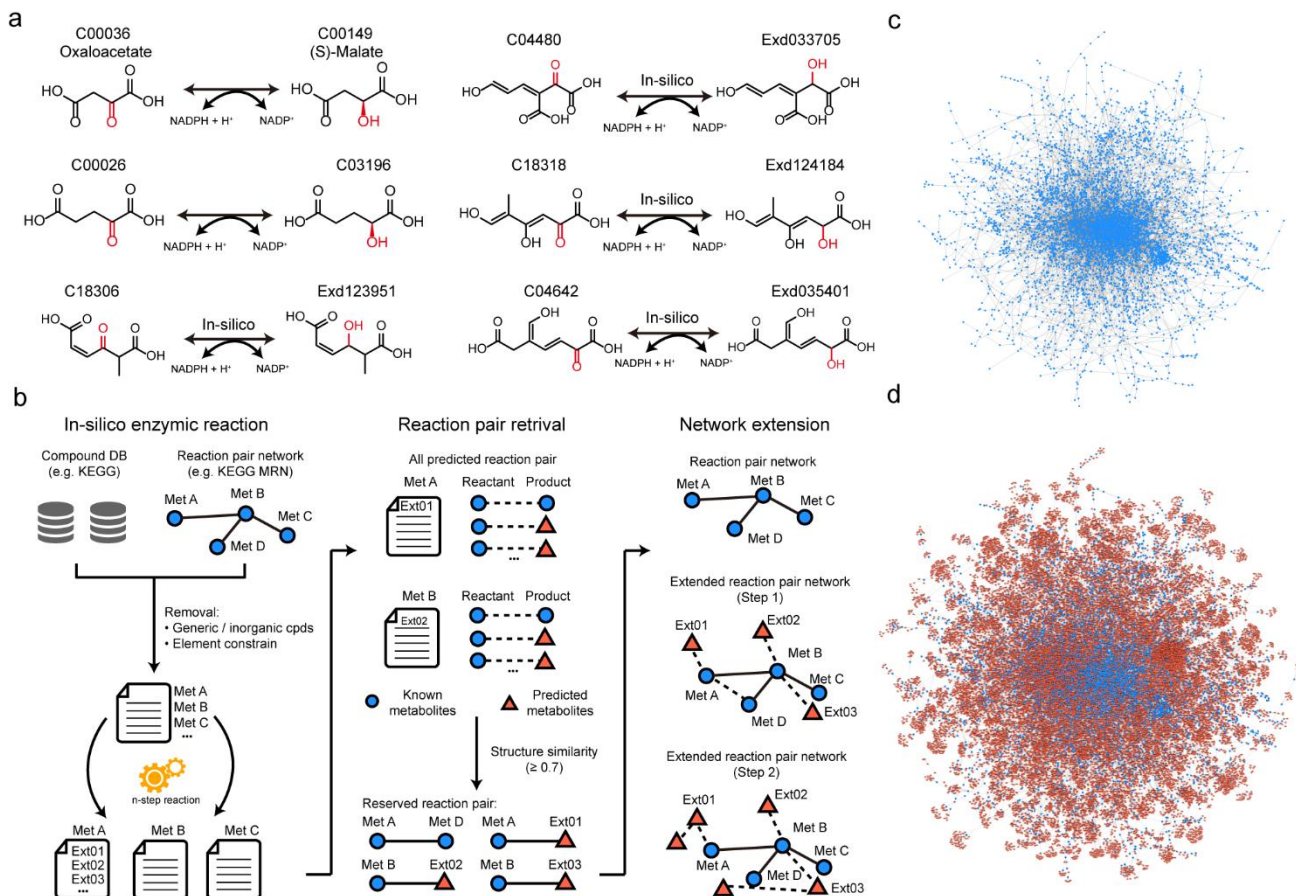

**Supplementary Figure 1.** Curation of knowledge-based metabolic reaction network (KMRN) with *in-silico* enzymatic reactions. **(a)** Examples for the curation of unknown metabolites through *in-silico* enzymatic reaction; **(b)** The workflow to curate the knowledge-based metabolic reaction network with *in-silico* enzymatic reactions. The known metabolites and reaction pairs were downloaded from the KEGG database, while the unknown metabolites were curated through *in-silico* enzymatic reactions. The reactant and product were paired and filtered with structural similarity. The knowledge-based metabolic reaction network was linked to the known metabolic reaction network. **(c-d)** Knowledge-based metabolic reaction networks: **(c)** known metabolites are connected through known reactions (6,397 nodes and 8,129 edges); **(d)** known and unknown metabolites are connected with known or *in-silico* reactions (41,336 nodes and 52,137 edges). The largest subnetwork is shown here.

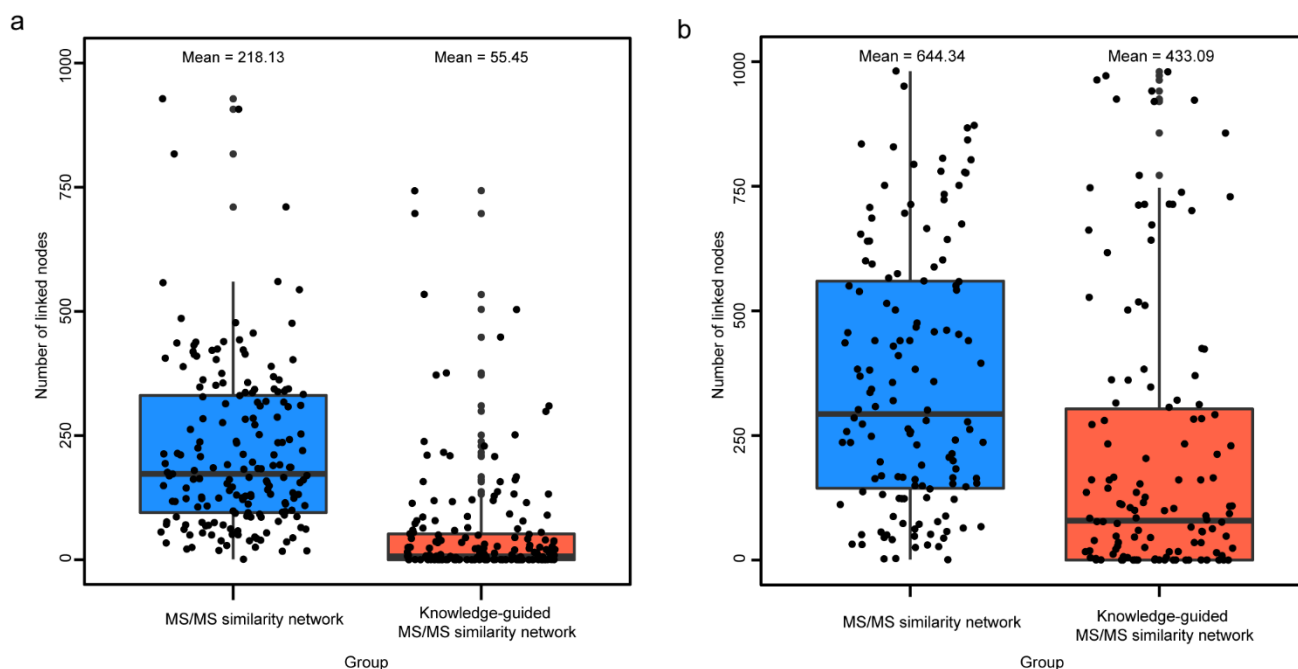

**Supplementary Figure 2.** Statistics of linked nodes in MS/MS similarity network or knowledge-guided MS/MS similarity network in positive (**a**) and negative modes (**b**), respectively. The linked nodes from seed metabolites in NIST human urine sample (N=181 and 163 in positive and negative modes, respectively) were included here. The cutoff of MS/MS similarity score is defined as 0.5. Neighbor metabolites within 3 steps were considered in knowledge-guided MS/MS similarity network. The lower, middle and upper lines in box plots (**a**, **b**) correspond to 25<sup>th</sup>, 50<sup>th</sup> and 75<sup>th</sup> quartiles, and the whiskers extend to the most extreme data point within 1.5 interquartile range (IQR).

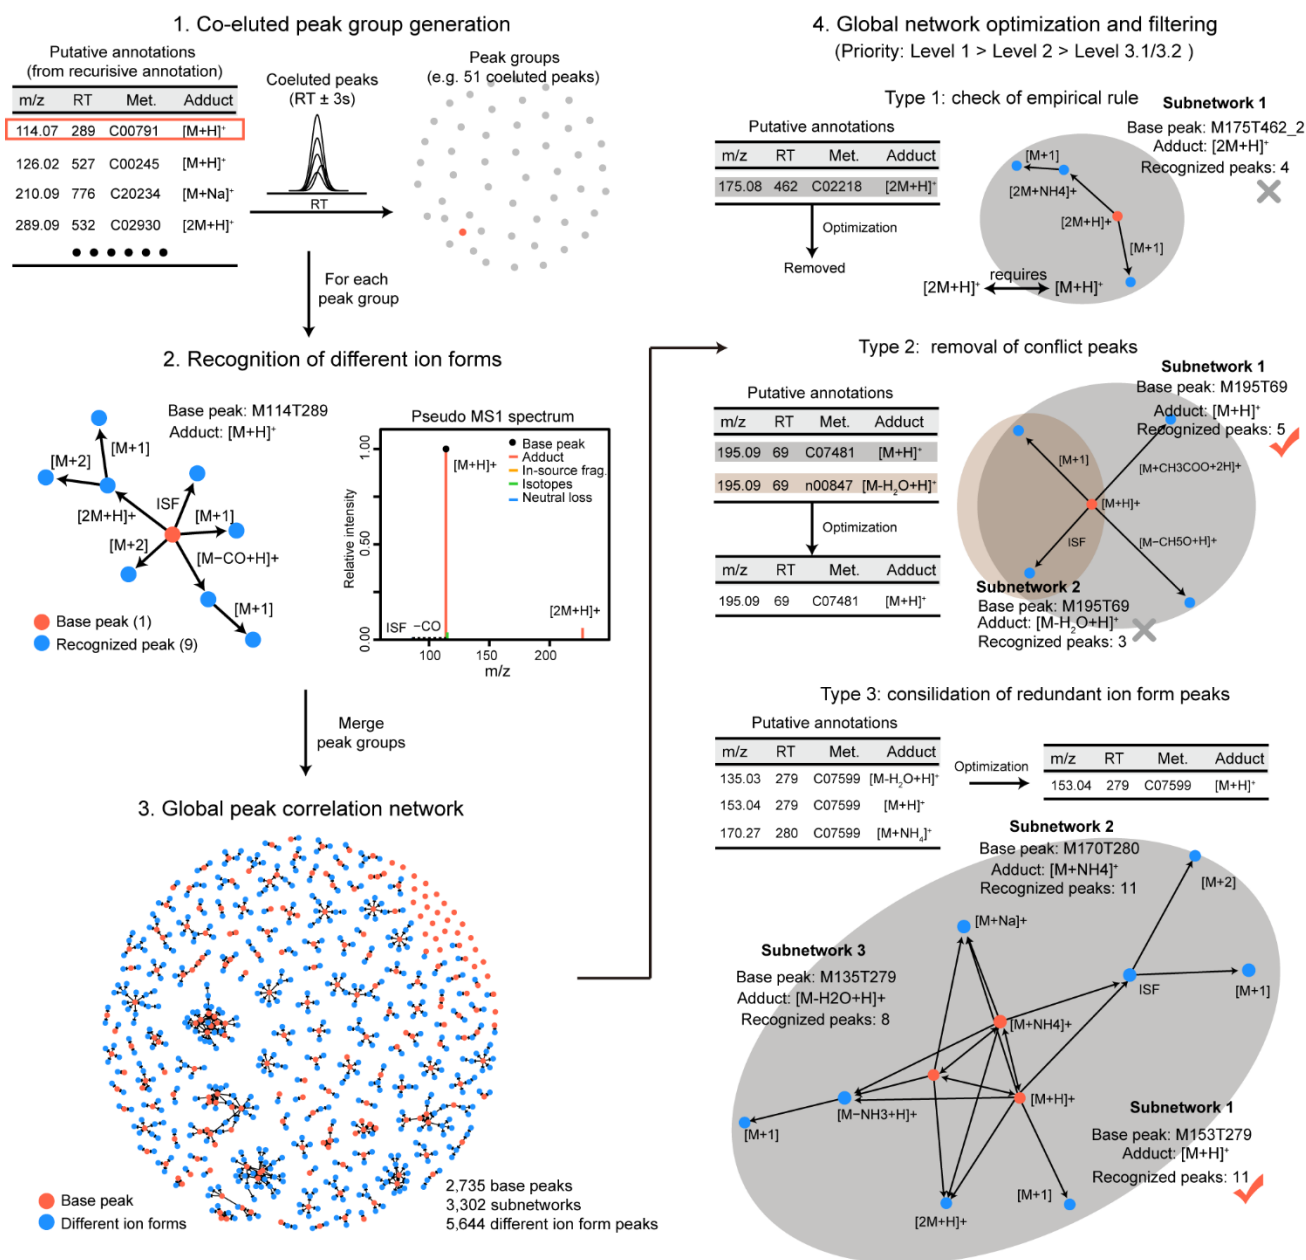

**Supplementary Figure 3.** The construction and optimization of global peak annotation network. **Step 1:** co-eluted peaks are extracted as one peak group according to the putative metabolite annotations in knowledge-guided MS/MS similarity network; **Step 2:** recognition of different ion forms to build the subnetwork, including adducts, isotopes, in-source fragments and neutral losses; **Step 3:** all recognized subnetworks are merged as a global peak correlation network; **Step 4:** global optimization and conflict resolving to improve the peak annotation accuracy. Three types of conflict annotations are checked and resolved, including empirical rule, removal of conflict peaks and annotations, and consolidation of redundant ion form peaks.

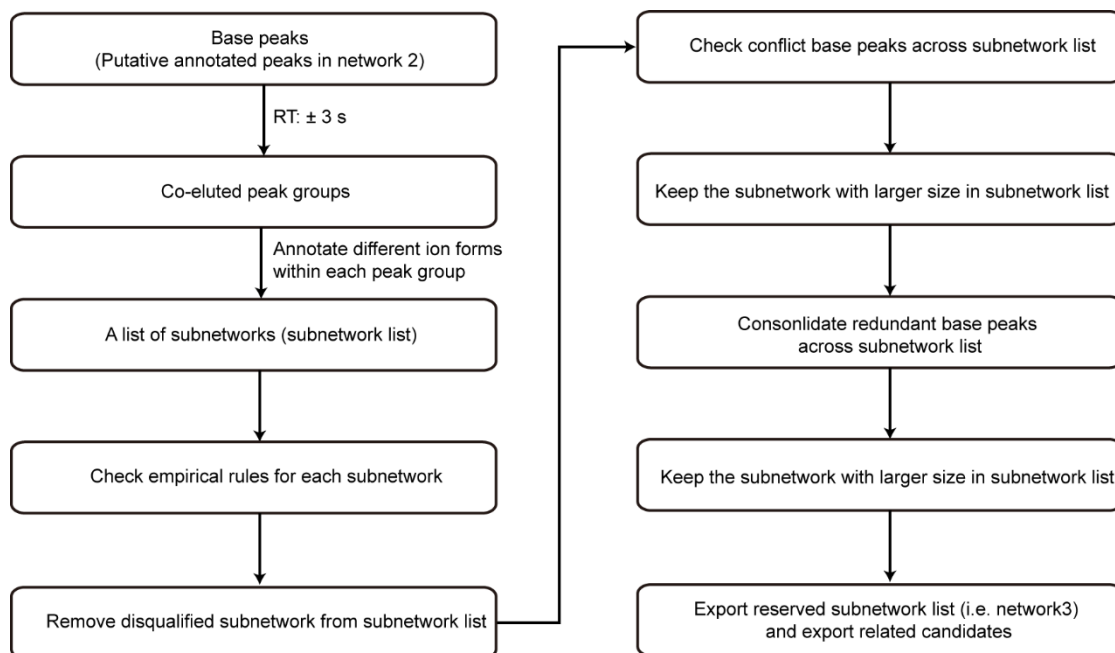

**Supplementary Figure 4.** Flowchart for the optimization and filtering of subnetworks in the global peak correlation network.

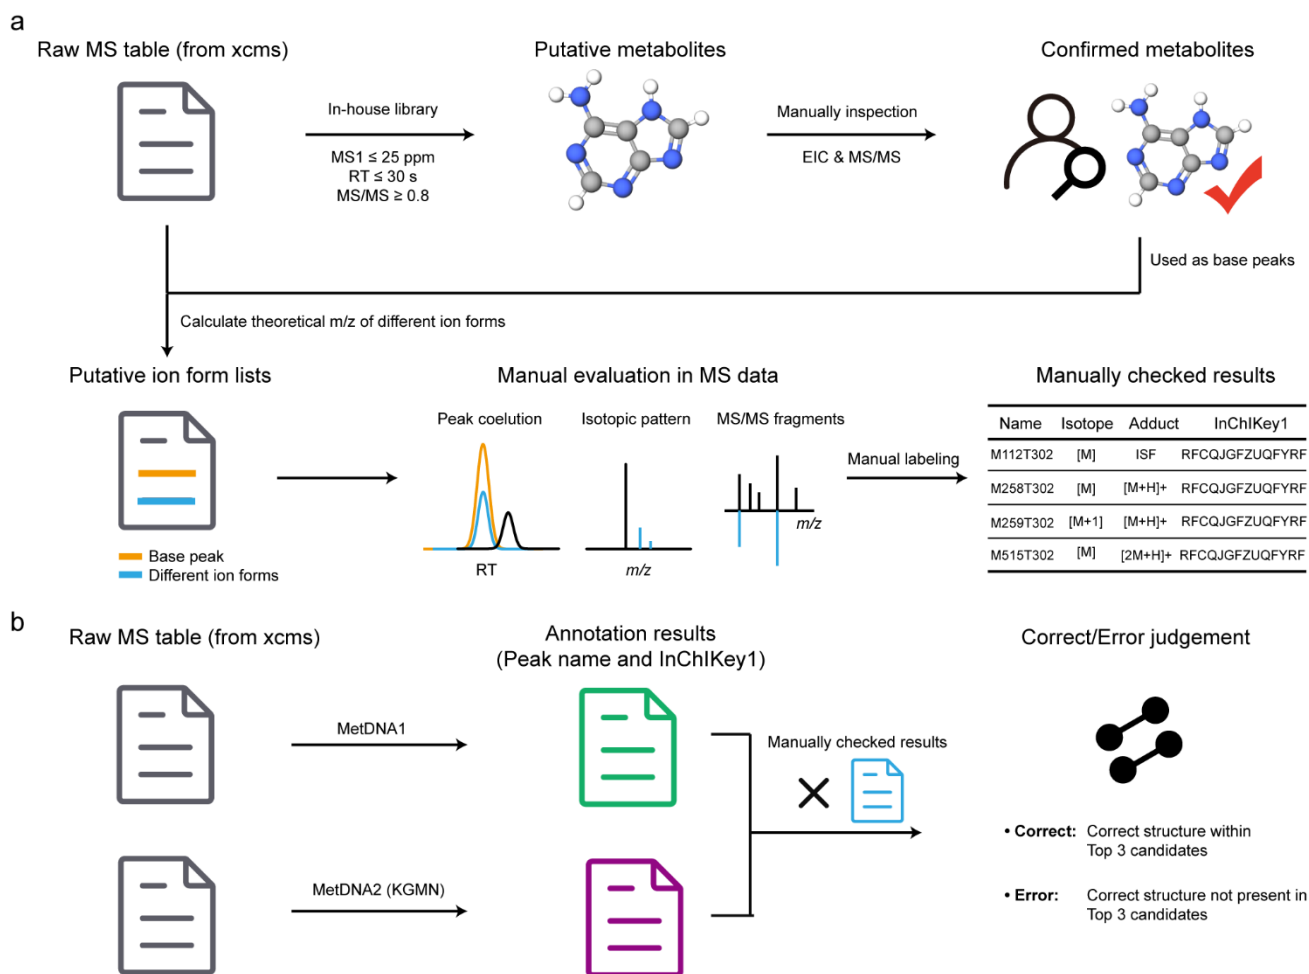

**Supplementary Figure 5.** The workflow of accuracy evaluation with a manually curated data set. **(a)** Curation of manually checked table; **(b)** Comparison of annotation results with manually checked results.



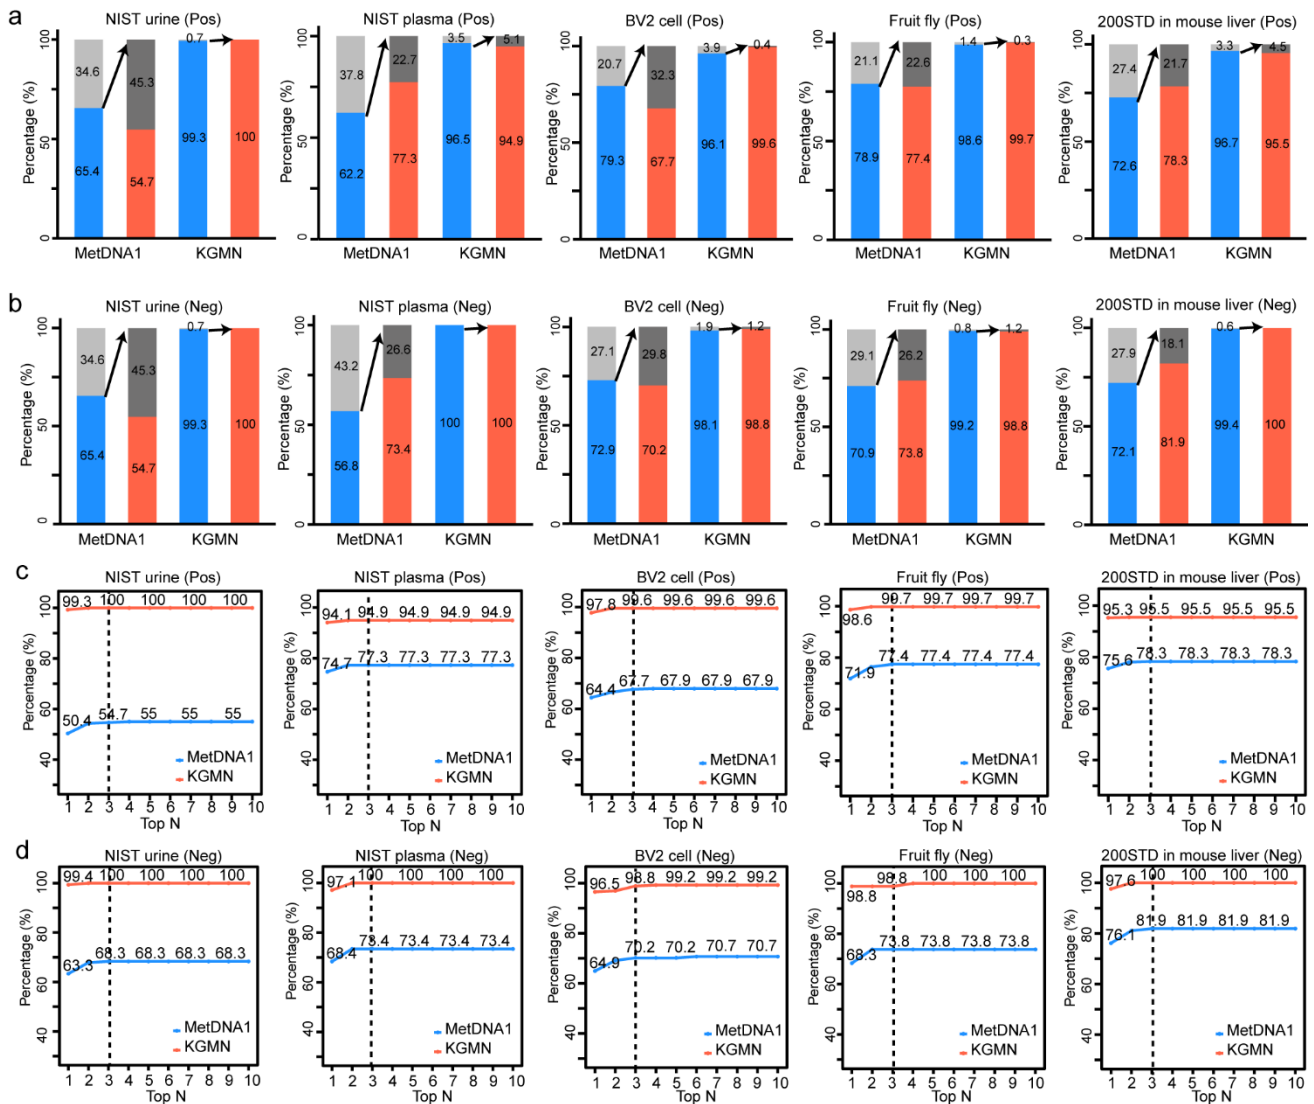

**Supplementary Figure 6.** Comparison between MetDNA1 and KGMM in different biological samples, including NIST human urine, NIST human plasma, BV2 cells, head tissues of fruit fly, and 200STD spiked mouse liver tissues. **(a-b)** Comparison of annotation coverages and correct/error percentages between MetDNA1 and KGMM in positive **(a)** and negative modes **(b)**, respectively. **(c-d)** Correct and error rates among top n (n = 1 to 10) annotations in different biological samples in positive **(c)** and negative modes **(d)**, respectively.

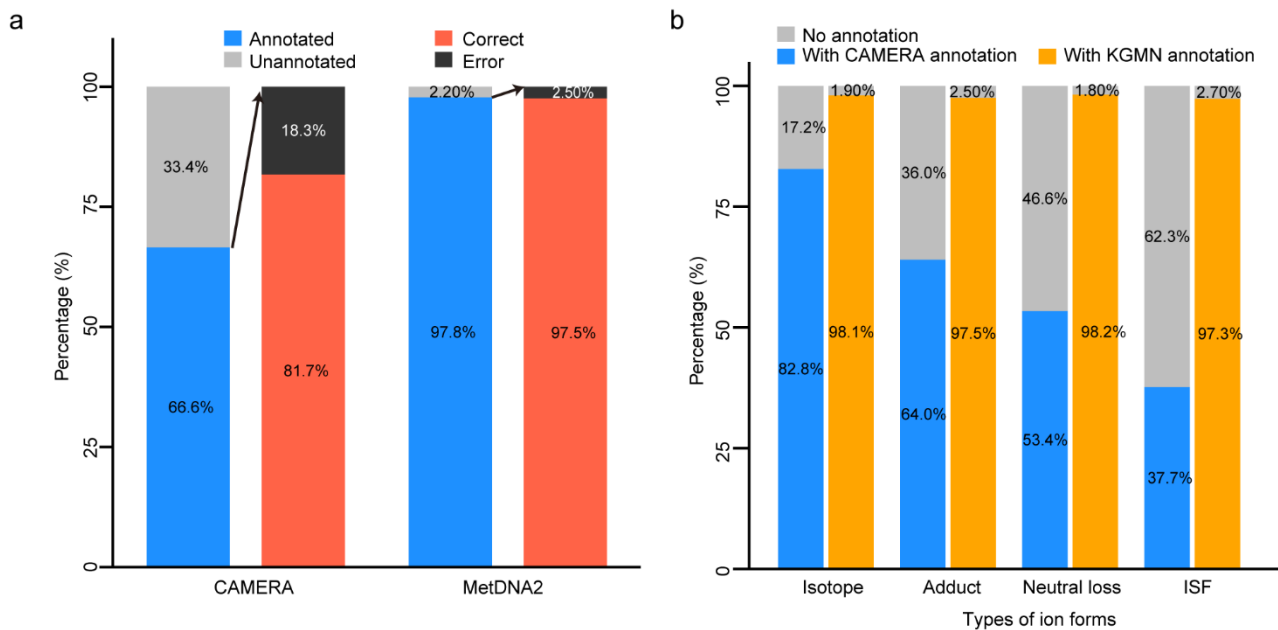

**Supplementary Figure 7.** Benchmark comparison between CAMERA and KGMN for annotating ion forms of metabolic peaks. **(a)** Percentages of annotation coverage and correct/error rates for annotating ion forms of metabolic peaks. **(b)** Annotation percentages for different types of ion forms. The R package “CAMERA” (v1.46.0) and the same rule table were used for evaluation.

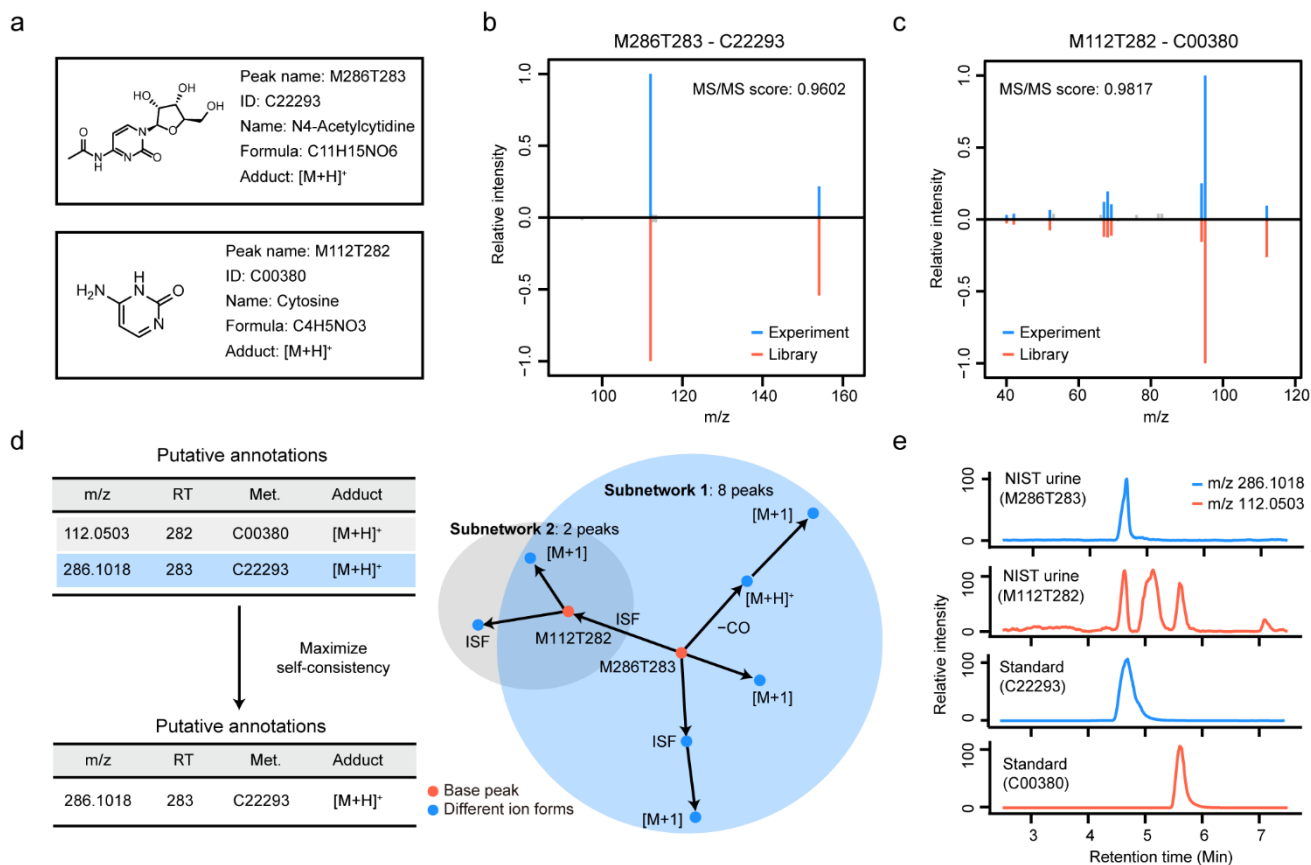

**Supplementary Figure 8.** KGMN recognized the in-source fragments of N4-Acetylcytidine. **(a)** Peak M286T283 and peak M112T282 were annotated as N4-Acetylcytidine and cytosine in MetDNA1, respectively. **(b-c)** MS/MS spectral match between experimental MS/MS spectra and the standard spectral libraries for N4-Acetylcytidine **(b)** and cytosine **(c)**. **(d)** Peak correlation subnetwork recognized M112T282 as an in-source fragment of M286T283. **(e)** The parallel acquisition of NIST human urine sample and chemical standards confirmed that peak M112T282 is an in-source fragment of M286T283.



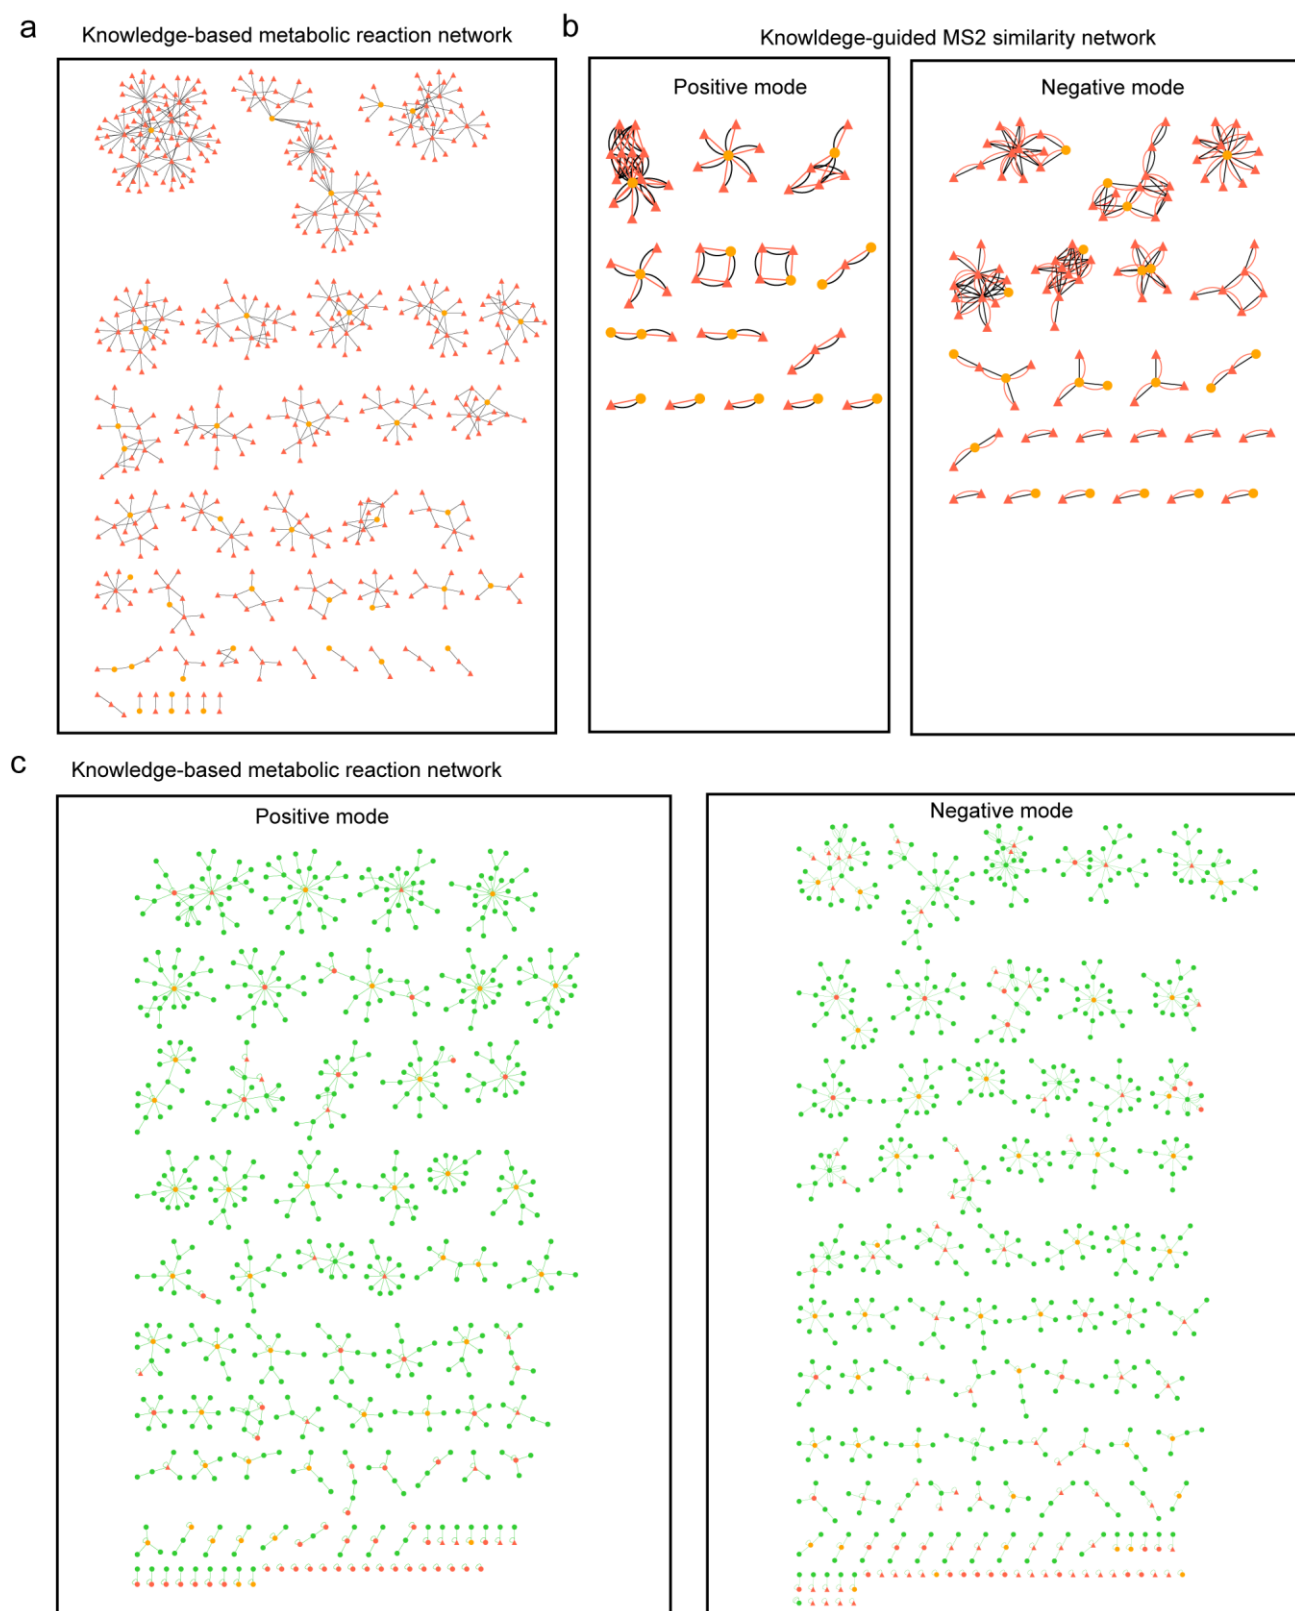

**Supplementary Figure 10.** Knowledge-guided multi-layer networks of 46std\_mix data sets. **(a)** Knowledge-based metabolic reaction network of 46 seed metabolites and unknown metabolites. The orange and red nodes represent seed and unknown metabolites, respectively. The unknown metabolites were curated via *in-silico* enzymatic reactions. The edges represent a biotransformation from known reactions or *in-silico* reactions. This network contains 531 unknown structures and 642

reaction pairs. **(b)** Knowledge-guided MS2 similarity network of 46 seed metabolites and unknown metabolites. The black and red edges represent the biotransformation and MS/MS spectral similarity. The edge of biotransformation represents two nodes can be transformed within 3-step reactions. The edge of MS/MS spectral similarity represents two nodes having MS/MS similarity (dot product score  $\geq 0.5$ ) or shared fragments ( $n \geq 4$ ). Only linked peaks are showed here. **(c)** Global peak correlation network of 46std\_mix data sets. The orange, red and green nodes represent seed, unknown and different ion form peaks. The edge represents an ion form relationship (isotope, adduct, neutral loss or in-source fragment) between two nodes. A total of 700 and 741 peaks are included in positive and negative modes, respectively.

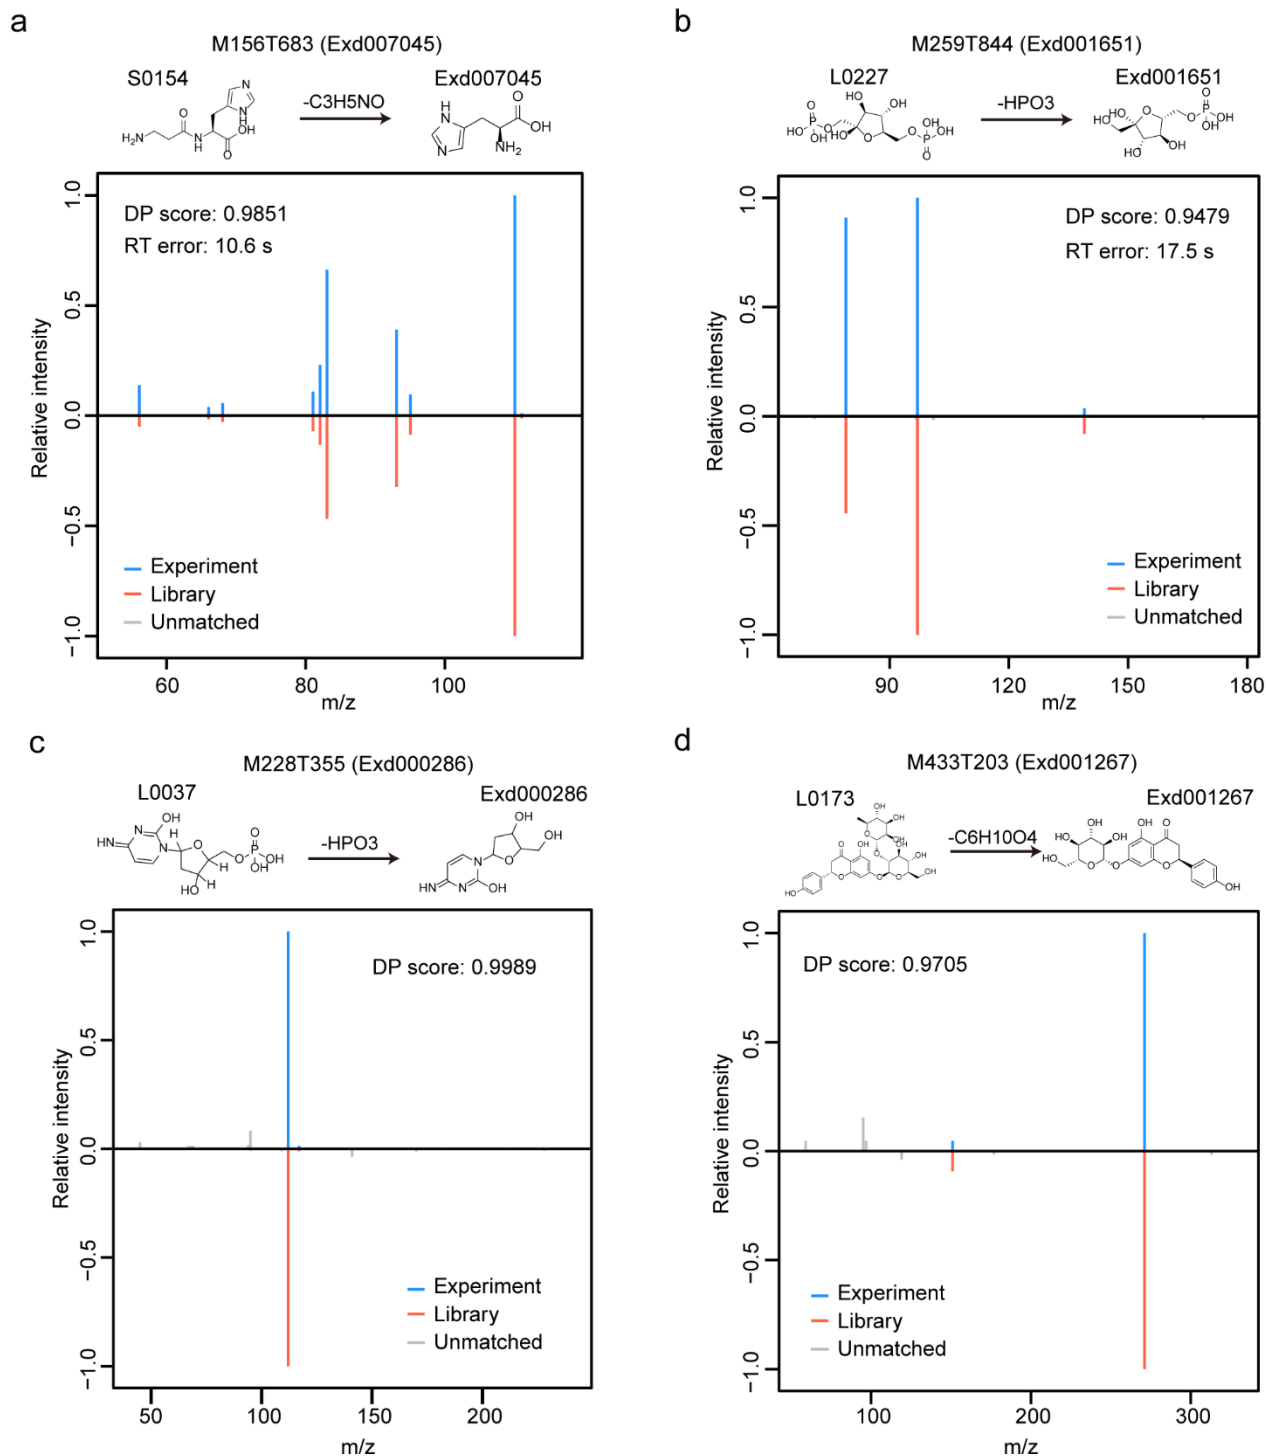

**Supplementary Figure 11.** Validation examples of annotated unknowns in 46std\_mix data sets. **(a-b)** Validation of unknowns using standards: **(a)** M156T683 (Exd007045, L-Histidine); and **(b)** M259T844 (Exd001651, D-Fructose 6-phosphate) in positive and negative modes, respectively; **(c-d)** validation of unknowns using public spectral databases: **(c)** M228T355 (Exd000286, Deoxycytidine), and **(d)** M433T203 (Exd001267, Naringenin 7-O-beta-D-glucoside) through MoNA and Metlin databases, respectively.

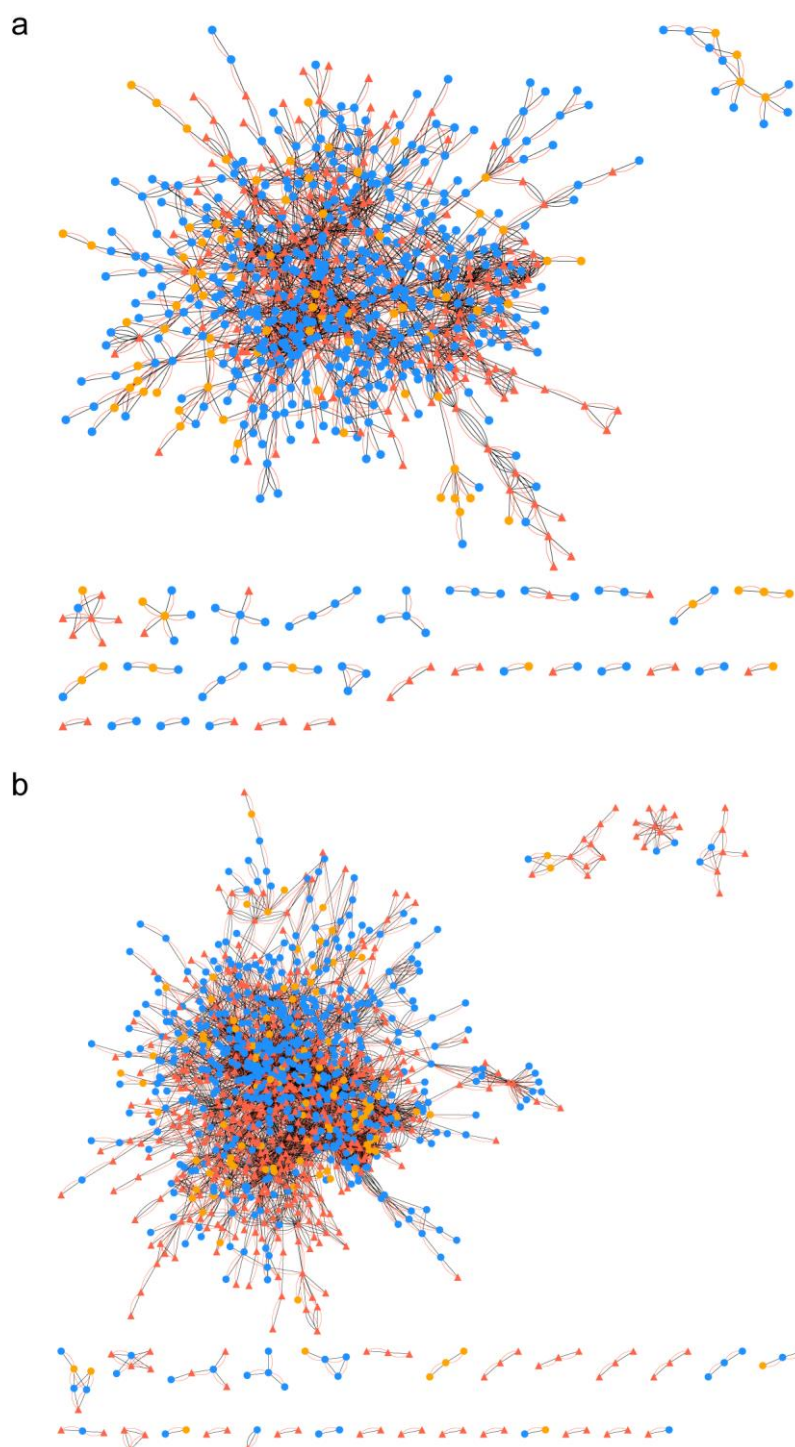

**Supplementary Figure 12.** Knowledge-guided MS/MS similarity network of NIST human urine sample: (a) positive mode; (b) negative mode. The positive mode network contains 1,100 nodes, and 3,170 edges. The negative mode contains 1,444 nodes, and 7,810 edges. The orange, blue, and red nodes represent seed, known and unknown metabolites, respectively. The black and red edges represent the biotransformation edge and the MS/MS similarity edge, respectively. The edge of biotransformation represents two nodes can be transformed within 3-step reactions. The edge of MS/MS similarity represents two nodes having MS/MS similarity (dot product score  $\geq 0.5$ ) or shared fragments ( $n \geq 4$ ). Only linked peaks are showed here.



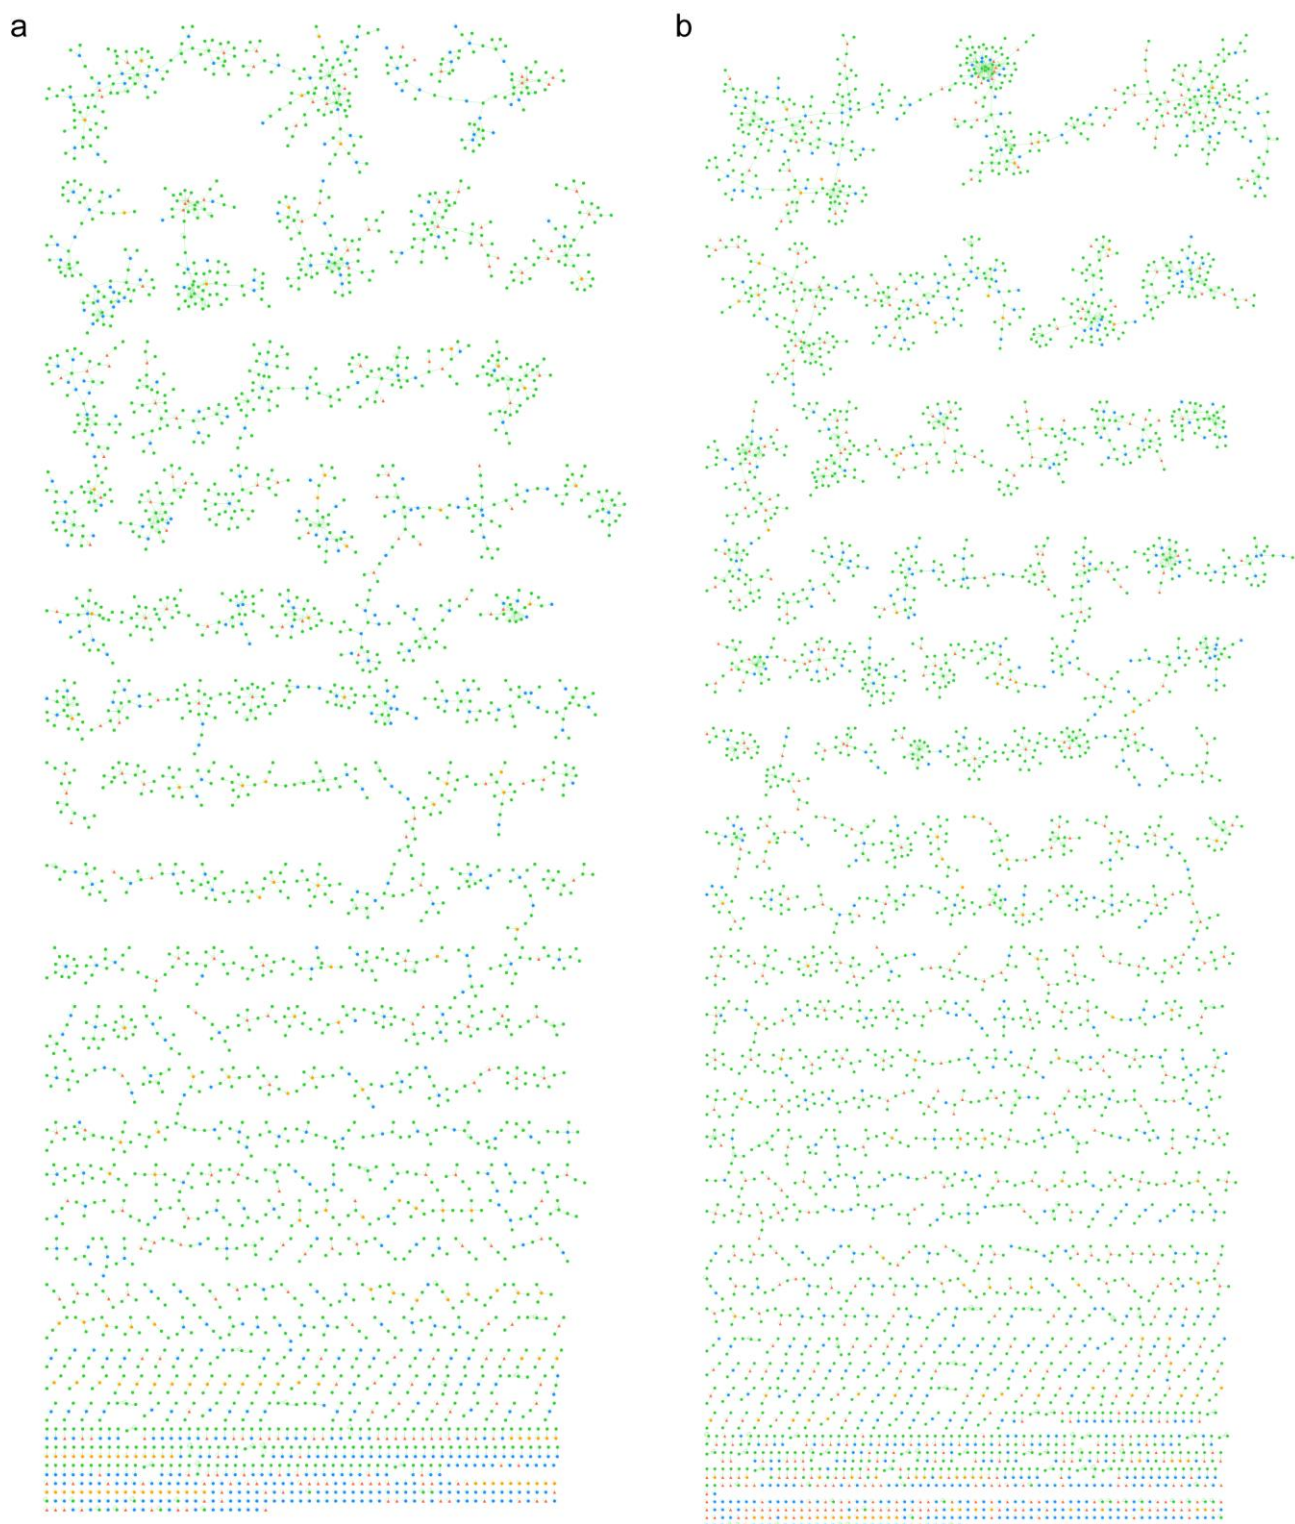

**Supplementary Figure 13.** Global peak correlation network of NIST human urine sample in positive (a) and negative (b) modes. It contains 3,301 nodes and 4,374 edges in positive mode, and 4,117 nodes and 5,750 edges in negative mode. The orange, blue, and red nodes represent seed, known and unknown metabolites from network 2, which were used as base peaks here. The green nodes represent different ion form peaks.

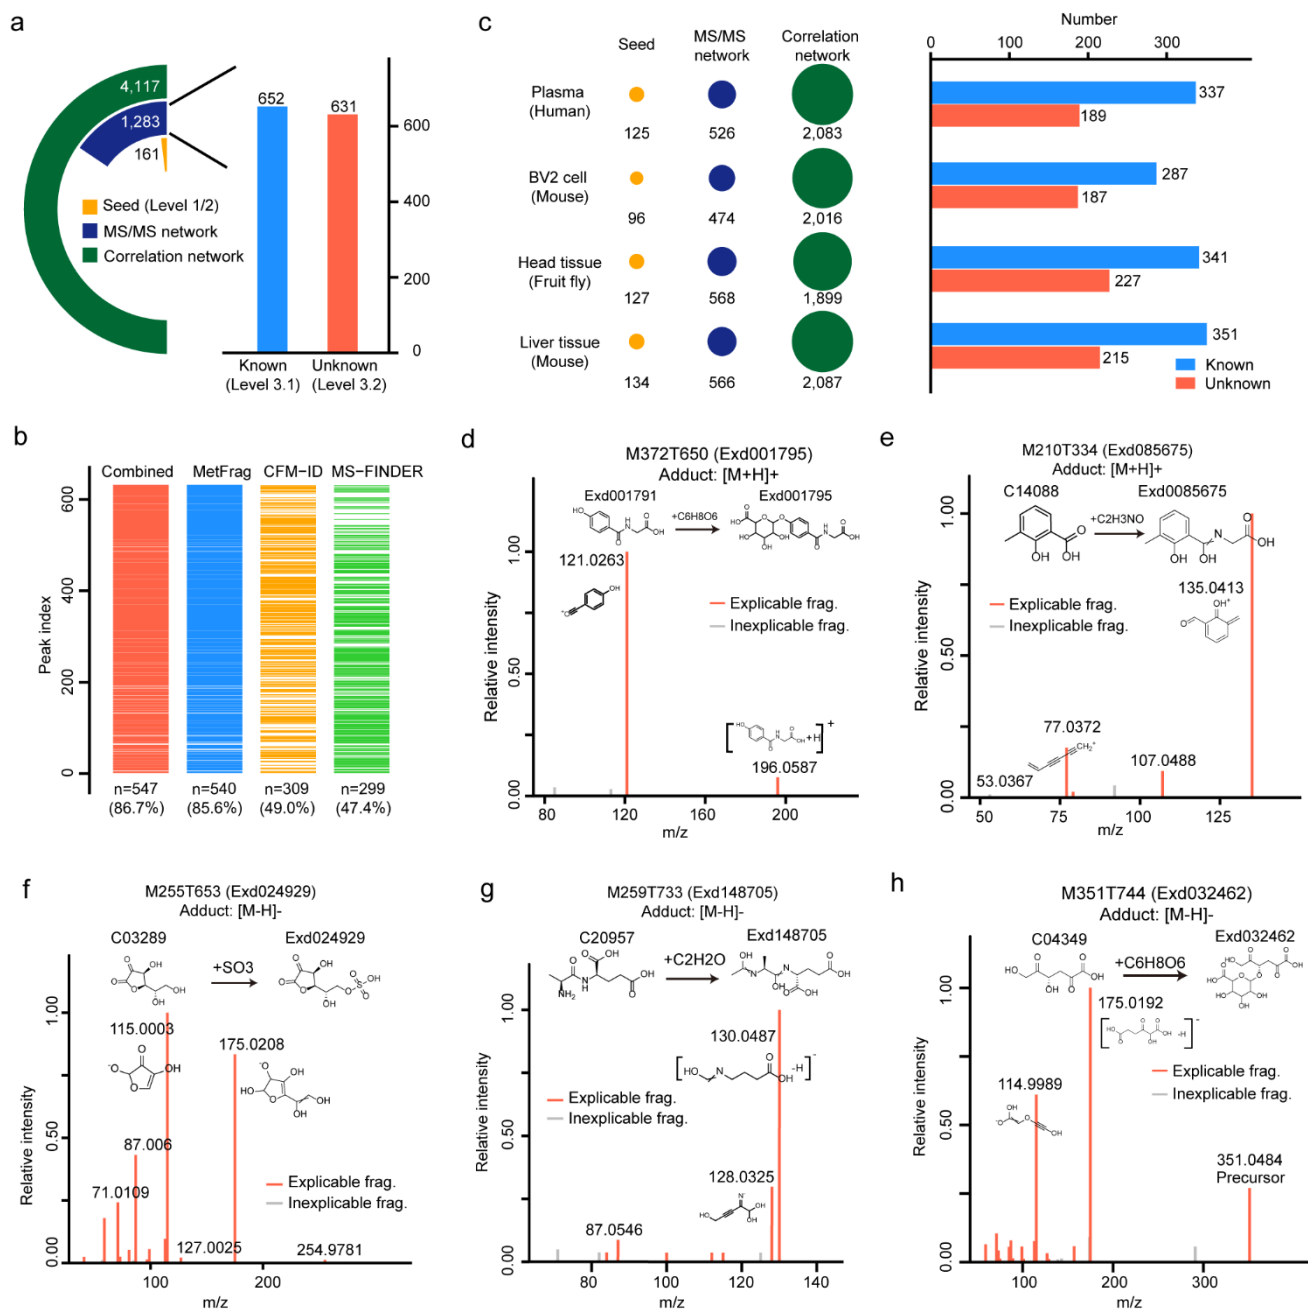

**Supplementary Figure 14.** Global annotation of unknown metabolites in negative mode and validation examples of unknowns using *in-silico* MS/MS tools. **(a)** The annotated known and unknown metabolites in NIST human urine samples in negative mode. The left panel is the statistics of annotated peaks in the multi-layer networks, and the right panel is the statistics of annotated known and unknown peaks. **(b)** Validations of annotated unknown metabolites in urine samples with different *in-silico* MS/MS tools. **(c)** Global annotations of metabolites in different biological samples in negative mode. The left panel is the statistics of annotated peaks in the multi-layer network, and the right panel is the statistics of known and unknown metabolites. **(d-h)** Validation examples of unknown metabolites using *in-silico* MS/MS tools.

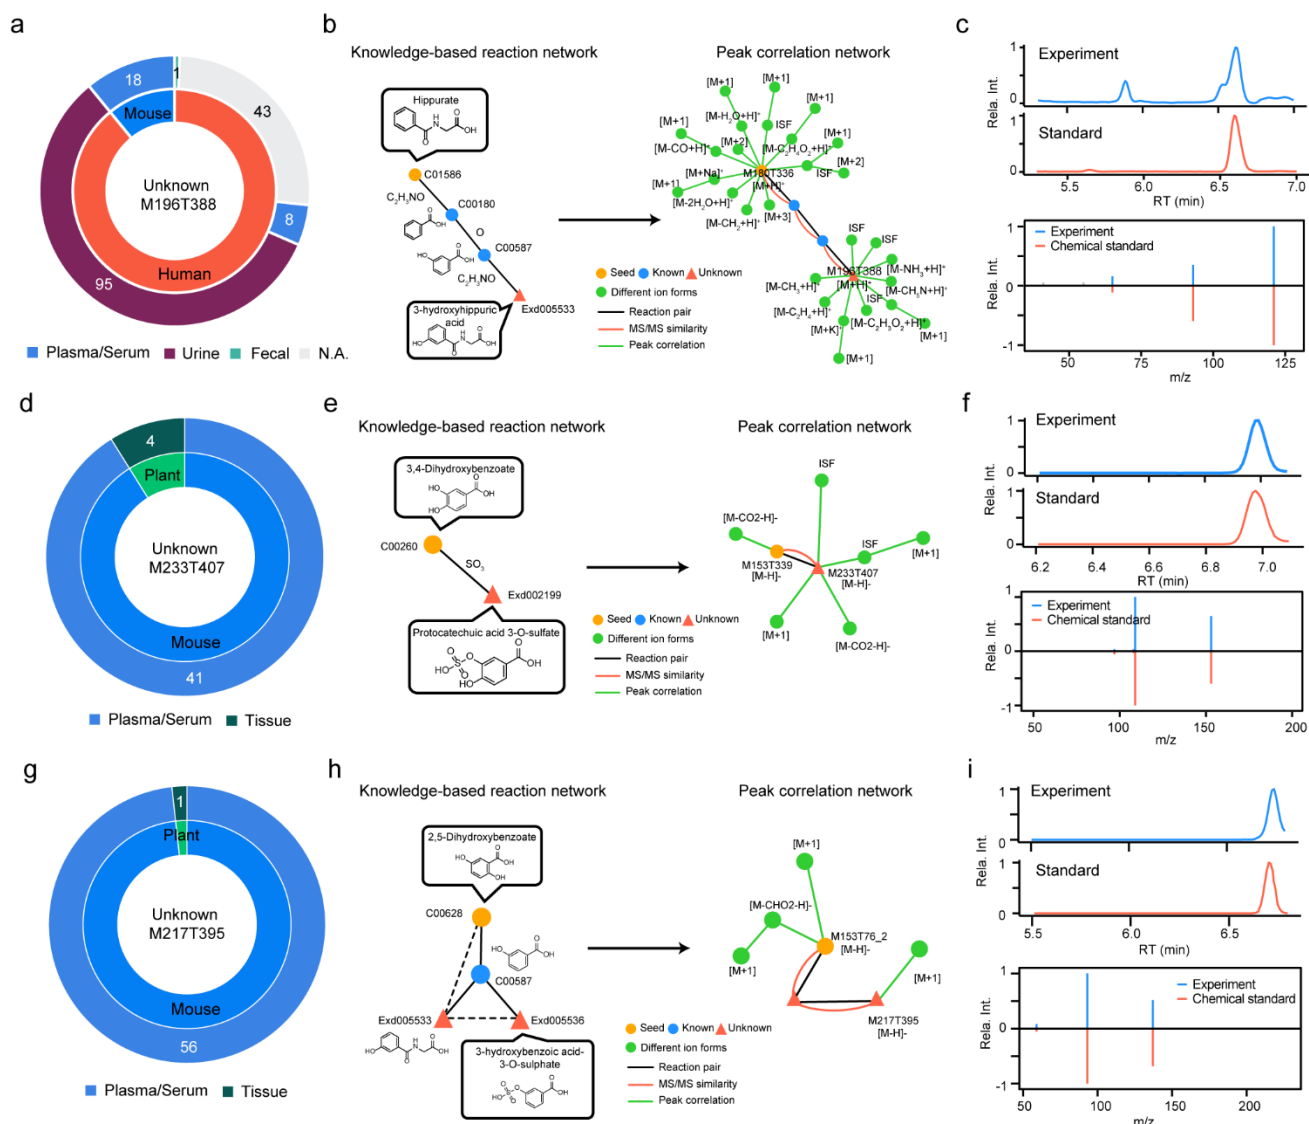

**Supplementary Figure 15.** The repository-mining and structural validations of 3 recurrent unknown metabolites. **(a-c)** a recurrent unknown metabolite (M196T388, 3-hydroxyhippuric acid); **(d-g)** a recurrent unknown metabolite (M233T407, protocatechuic acid 3-O-sulfate); **(g-i)** a recurrent unknown metabolite (M217T395, 3-hydroxybenzoic acid-3-O-sulphate). The panels **a**, **d**, **g** are recurrent distributions of species and sample types; the inner and outer pie plots are the distributions in species and sample types, respectively. The panels **b**, **e**, **h** are the details of unknown annotations using KGMN. The panels **c**, **f**, **i** are the structural validations using the synthetic standards by matching the retention time and MS/MS spectra.

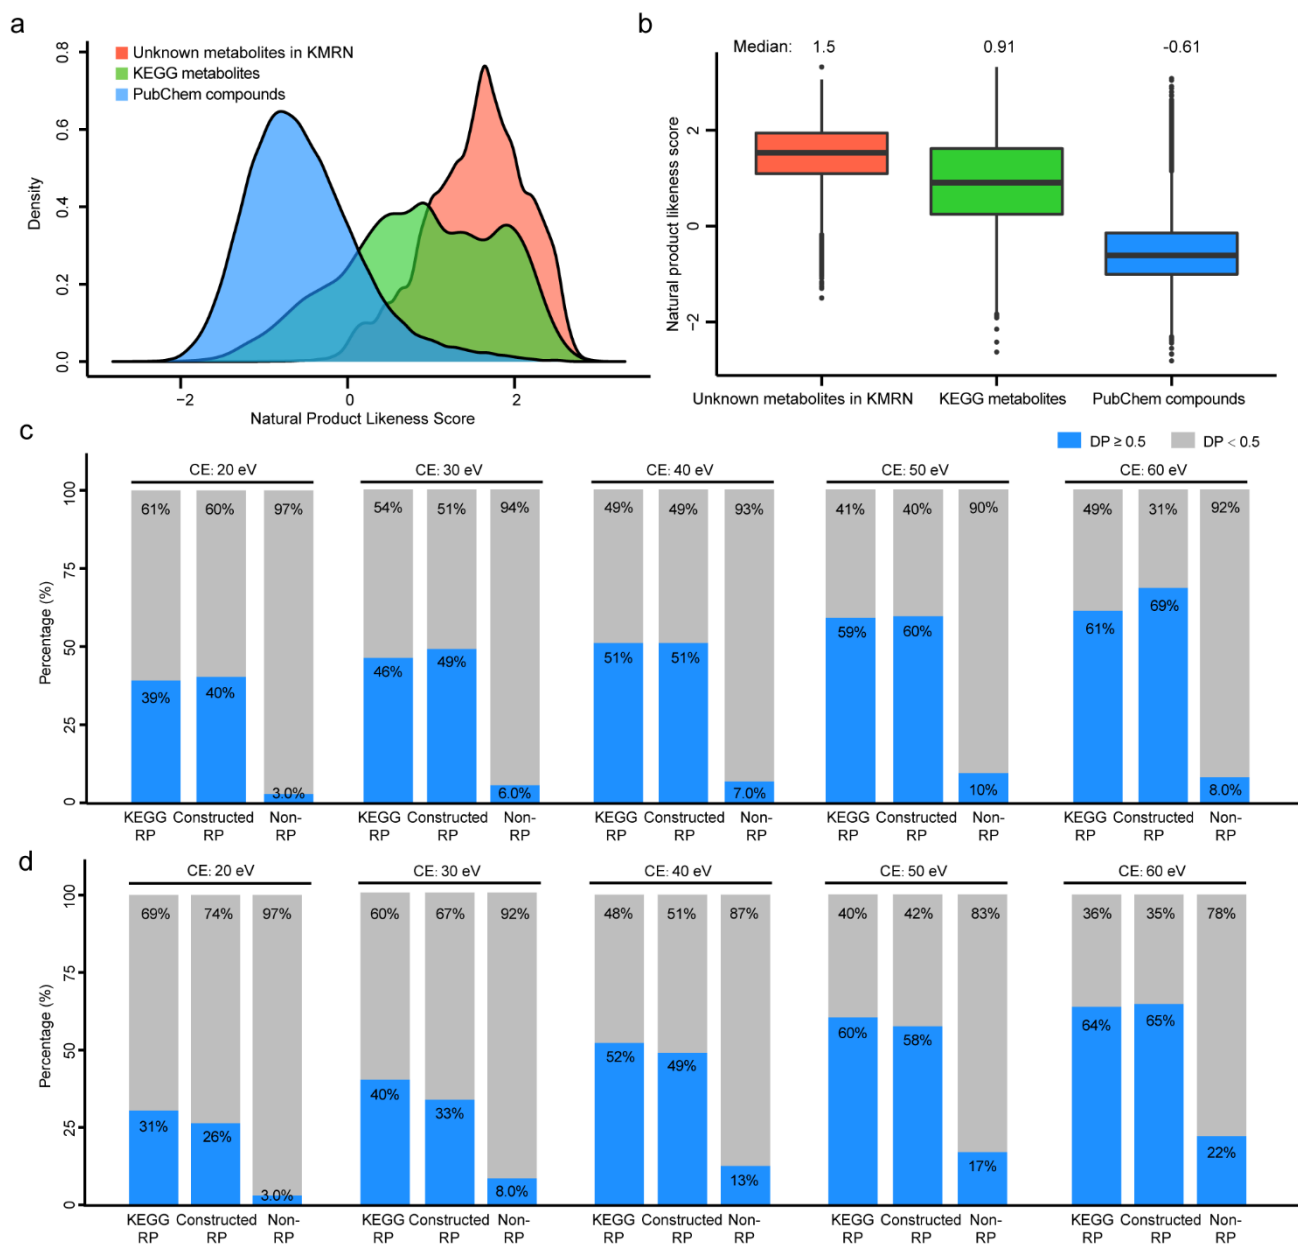

**Supplementary Figure 16.** Curated unknown metabolites and reaction pairs in the knowledge-based metabolic reaction network (KMRN). **(a)** Distribution of natural product likeness score of unknown metabolites in KMRN, KEGG metabolites, and PubChem compounds. 100,000 PubChem compounds were randomly retrieved to represent the PubChem database. **(b)** Natural product likeness score of unknown metabolites in KMRN ( $n=159,083$ ), KEGG metabolites ( $n=16,085$ ), and PubChem compounds ( $n=100,000$ ). **(c-d)** MS/MS spectral similarity comparison among KEGG reaction pairs, *in-silico* curated unknown reaction pairs (i.e., constructed RP), and non-reaction pairs in positive **(c)** and negative **(d)**, respectively. The lower, middle and upper lines in box plots **(b)** correspond to 25<sup>th</sup>, 50<sup>th</sup> and 75<sup>th</sup> quartiles, and the whiskers extend to the most extreme data point within 1.5 interquartile range (IQR).

**Supplementary Table 1. The supported data processing tools with KGMN**

| Stage                 | Usage                                              | Tool      | Version           | Tutorial               |
|-----------------------|----------------------------------------------------|-----------|-------------------|------------------------|
| Peak picking software | Generation of required feature list for KGMN       | XCMS      | V1.46.0 or higher | <a href="#">Link 1</a> |
|                       |                                                    | MS-DIAL   | V4.60 or higher   | <a href="#">Link 2</a> |
|                       |                                                    | MZmine    | V3.0.21 or higher | <a href="#">Link 3</a> |
| In-silico MS/MS tools | Cross validation of putative metabolites from KGMN | MetFrag   | V2.4.5 or higher  | <a href="#">Link 4</a> |
|                       |                                                    | CFM-ID    | V2.4 or higher    | <a href="#">Link 4</a> |
|                       |                                                    | MS-FINDER | V3.24 or higher   | <a href="#">Link 4</a> |
| Repository mining     | Search in the metabolomics repository              | MASST     | Workflow29        | <a href="#">Link 5</a> |
| Visualization         | Visualization of KGMN results                      | Cytoscape | V5.8.3 or higher  | <a href="#">Link 6</a> |

**Note:**

- Link 1: <http://metdna.zhulab.cn/metdna/help#3.1>
- Link 2: <http://metdna.zhulab.cn/metdna/help#3.2>
- Link 3: <http://metdna.zhulab.cn/metdna/help#3.3>
- Link 4: [https://github.com/ZhuMetLab/MetDNA2\\_Web/blob/main/Tutorials/Tutorial\\_KGMN\\_and\\_insilico\\_ms2.pdf](https://github.com/ZhuMetLab/MetDNA2_Web/blob/main/Tutorials/Tutorial_KGMN_and_insilico_ms2.pdf)
- Link 5: [https://github.com/ZhuMetLab/MetDNA2\\_Web/blob/main/Tutorials/Tutorial\\_KGMN\\_and\\_MASST.pdf](https://github.com/ZhuMetLab/MetDNA2_Web/blob/main/Tutorials/Tutorial_KGMN_and_MASST.pdf)
- Link 6: [https://github.com/ZhuMetLab/MetDNA2\\_Web/blob/main/Tutorials/Tutorial\\_visualization.pdf](https://github.com/ZhuMetLab/MetDNA2_Web/blob/main/Tutorials/Tutorial_visualization.pdf)

**Supplementary Table 2.** Statistics of global peak annotation optimization to improve annotation accuracy.

| No.     | Data set<br>(Polarity)               | Peaks | MetDNA1             |       |                    | MetDNA2             |        |                     |
|---------|--------------------------------------|-------|---------------------|-------|--------------------|---------------------|--------|---------------------|
|         |                                      |       | Peak with<br>candi. | Candi | Accuracy<br>(Top3) | Peak with<br>candi. | Candi. | Accuracy<br>(Top 3) |
| 1       | NIST urine<br>(Pos)                  | 425   | 278                 | 596   | 152<br>(54.7%)     | 422                 | 464    | 422<br>(100%)       |
| 2       | NIST urine<br>(Neg)                  | 325   | 221                 | 423   | 151<br>(68.3%)     | 313                 | 316    | 313<br>(100%)       |
| 3       | NIST<br>plasma<br>(Pos)              | 368   | 229                 | 361   | 177<br>(77.3%)     | 355                 | 392    | 337<br>(94.9%)      |
| 4       | NIST<br>plasma<br>(Neg)              | 139   | 79                  | 129   | 58<br>(73.4%)      | 139                 | 153    | 139<br>(100%)       |
| 5       | BV2 cell<br>(Pos)                    | 464   | 368                 | 604   | 249<br>(67.7%)     | 446                 | 457    | 444<br>(99.6%)      |
| 6       | BV2 cell<br>(Neg)                    | 262   | 191                 | 307   | 134<br>(70.2%)     | 257                 | 286    | 254<br>(98.8%)      |
| 7       | Fruit fly<br>head<br>(Pos)           | 365   | 288                 | 442   | 223<br>(77.4%)     | 360                 | 383    | 359<br>(99.7%)      |
| 8       | Fruit fly<br>head<br>(Neg)           | 258   | 183                 | 353   | 135<br>(73.8%)     | 256                 | 280    | 253<br>(98.8%)      |
| 9       | 200STD in<br>mouse<br>liver<br>(Pos) | 508   | 369                 | 459   | 289<br>(78.3%)     | 491                 | 506    | 469<br>(95.5%)      |
| 10      | 200STD in<br>mouse<br>liver<br>(Neg) | 337   | 243                 | 361   | 199<br>(81.9%)     | 335                 | 356    | 335<br>(100%)       |
| Summary |                                      | 3,451 | 2,449               | 4,035 | 1,767              | 3,374               | 3,593  | 3,325               |

**Supplementary Table 3.** Statistics of biotransformation types in 46std\_mix data set.

| No. | Biotransformation | Positive mode | Negative mode |
|-----|-------------------|---------------|---------------|
| 1   | C6H8O6            | 6             | 47            |
| 2   | SO3               | 10            | 44            |
| 3   | HPO3              | 24            | 30            |
| 4   | O                 | 7             | 17            |
| 5   | H2O               | 3             | 11            |
| 6   | C2H2O             | 0             | 4             |
| 7   | CH3               | 0             | 4             |
| 8   | C2H3NO            | 0             | 3             |
| 9   | C4H4O3            | 1             | 2             |
| 10  | C3H5NO            | 2             | 1             |
| 11  | C10H10N4O3        | 0             | 1             |
| 12  | C6H10O4           | 0             | 1             |
| 13  | C6H9O6            | 0             | 1             |
| 14  | H2                | 0             | 1             |
| 15  | CO2               | 1             | 0             |

**Supplementary Table 4.** Statistics of annotated peaks in different biological samples

| Data sets             | Seed peaks | MS/MS network |         |       | Peak correlation network |
|-----------------------|------------|---------------|---------|-------|--------------------------|
|                       |            | Known         | Unknown | Sum   |                          |
| NIST urine (Pos)      | 173        | 634           | 293     | 927   | 3,301                    |
| NIST urine (Neg)      | 161        | 652           | 631     | 1,283 | 4,117                    |
| NIST plasma (Pos)     | 135        | 310           | 73      | 383   | 1,774                    |
| NIST plasma (Neg)     | 125        | 337           | 189     | 526   | 2,083                    |
| BV2 cell (Pos)        | 188        | 398           | 183     | 581   | 2,827                    |
| BV2 cell (Neg)        | 96         | 287           | 187     | 474   | 2,016                    |
| Fruit fly brain (Pos) | 187        | 265           | 122     | 387   | 1,883                    |
| Fruit fly brain (Neg) | 127        | 341           | 227     | 568   | 1,899                    |
| Mouse liver (Pos)     | 209        | 270           | 107     | 377   | 2,464                    |
| Mouse liver (Neg)     | 134        | 351           | 215     | 566   | 2,087                    |
| Average               | 154        | 385           | 223     | 607   | 2,445                    |



**Supplementary Table 5.** Statistics of unknown biotransformation types in NIST urine data set

| No. | Biotransformation | Pos | Neg  | No. | Biotransformation | Pos | Neg |
|-----|-------------------|-----|------|-----|-------------------|-----|-----|
| 1   | SO3               | 322 | 1045 | 31  | H                 | 2   | 3   |
| 2   | C6H8O6            | 353 | 905  | 32  | C19H20N3O11P      | 2   | 2   |
| 3   | H2                | 251 | 505  | 33  | C29H49N3O17P2     | 0   | 2   |
| 4   | O                 | 71  | 160  | 34  | C3H3O5P           | 0   | 2   |
| 5   | HPO3              | 15  | 119  | 35  | C5H8NO3           | 0   | 2   |
| 6   | H2O               | 100 | 108  | 36  | CO                | 6   | 2   |
| 7   | C2H2O             | 60  | 105  | 37  | C12H22N2O7        | 0   | 1   |
| 8   | C2H3NO            | 57  | 83   | 38  | C14H26O           | 0   | 1   |
| 9   | CH2               | 41  | 59   | 39  | C15H9O4           | 4   | 1   |
| 10  | isomer            | 33  | 56   | 40  | C18H14N2O7        | 0   | 1   |
| 11  | CH3               | 10  | 38   | 41  | C2H4O             | 0   | 1   |
| 12  | C7H12O6           | 20  | 34   | 42  | C30H25O12         | 6   | 1   |
| 13  | C6H9O6            | 3   | 29   | 43  | C30H48O2          | 1   | 1   |
| 14  | C6H10O5           | 33  | 22   | 44  | C3H2O             | 0   | 1   |
| 15  | C6H11O5           | 17  | 20   | 45  | C61H100O11P2      | 0   | 1   |
| 16  | CO2               | 10  | 19   | 46  | C67H110O16P2      | 0   | 1   |
| 17  | C11H18O10         | 0   | 10   | 47  | C6H13N4O          | 0   | 1   |
| 18  | C7H10O6           | 8   | 10   | 48  | C8H13NO           | 0   | 1   |
| 19  | C2O3              | 0   | 6    | 49  | HO3S              | 0   | 1   |
| 20  | C15H9O5           | 3   | 4    | 50  | -2O+H             | 12  | 0   |
| 21  | C23H34N4O19P2     | 7   | 4    | 51  | C3H2O3            | 6   | 0   |
| 22  | C2H4              | 2   | 4    | 52  | C33H50O8          | 5   | 0   |
| 23  | C5H7NO3           | 0   | 4    | 53  | C27H40O2          | 3   | 0   |
| 24  | C10H15N3O6S       | 2   | 3    | 54  | C6H10O4           | 2   | 0   |
| 25  | C12H16O10         | 3   | 3    | 55  | C7H4O4            | 1   | 0   |
| 26  | C12H20O10         | 5   | 3    | 56  | C7H5NO            | 1   | 0   |
| 27  | C15H8O2           | 6   | 3    |     |                   |     |     |
| 28  | C3H6NO            | 1   | 3    |     |                   |     |     |
| 29  | C8H12O7           | 4   | 3    |     |                   |     |     |
| 30  | CH6N7O15P3S       | 0   | 3    |     |                   |     |     |

# Tutorial of KGMN result visualization and analysis

Zhiwei Zhou

2022-06-05

## Introduction

Unknown metabolite annotation is one of long-standing challenges in untargeted metabolomics. We develop an approach, namely, knowledge-guided multi-layer network (KGMN), to enable global metabolite annotation from knowns to unknowns in untargeted metabolomics. The KGMN approach integrates three-layer networks, including knowledge-based metabolic reaction network (Network 1), knowledge-guided MS/MS similarity network (Network 2), and global peak correlation network (Network 3). This tutorial will help users to visualize, reproduce and investigate putatively annotated known and unknown metabolites from KGMN.

## 1. Installation

The analysis and visualization of KGMN results mainly relies on R package – MetDNA2Vis, and its depended R packages; The Cytoscape software is used for manually visualize networks, and interactively investigate results of KGMN; The ChemDraw software is involved for drawing chemical structures.

- Install R packages

```
# Install related packages
```

```
if(!require(devtools)){
```

```
install.packages("devtools")
```

```
}
```

```
if(!require(BiocManager)){
```

```
install.packages("BiocManager")
```

```
}
```

```
# Install CRAN/Bioconductor packages
```

```
required_pkgs <- c("dplyr", "tidyr", "readr", "CHNOSZ", "igraph",
```

```
"magrittr", "ggplot2", "ggraph", "tidygraph")
```

```

list_installed <- installed.packages()

new_pkgs <- required_pkgs[!(required_pkgs %in% list_installed[, 'Package'])]
if (length(new_pkgs) > 0) {
  BiocManager::install(new_pkgs)
} else {
  cat('Required CRAN/Bioconductor packages installed\n')
}

# Install ZhuLab packages
devtools::install_github("ZhuMetLab/SpectraTools")
devtools::install_github("ZhuMetLab/MetDNA2Vis")

```

- Cytoscape software (Version 3.8 or higher required): <https://cytoscape.org/>
- ChemDraw software (Version 19.0 or higher required): <https://perkinelmerinformatics.com/products/research/chemdraw>

## 2. Step-by-step instruction for visualization

In this part, we introduce how to visualize multi-layer networks from KGMN. It will help users to reproduce figures in KGMN manuscripts. Here, the Human NIST urine (Positive data, used in KGMN manuscript) is used as a demo dataset. This data set have been processed and exported by **MetDNA2 web server** (version 1.0.4). The raw data files and results can be downloaded at [here](https://mega.nz/file/8v50iL6T#oILf8wIVJU_iqTfjcOtH1TRHhnP1GGbvG_ZNb1xniGc) ([https://mega.nz/file/8v50iL6T#oILf8wIVJU\\_iqTfjcOtH1TRHhnP1GGbvG\\_ZNb1xniGc](https://mega.nz/file/8v50iL6T#oILf8wIVJU_iqTfjcOtH1TRHhnP1GGbvG_ZNb1xniGc)). The more details of sample extraction and data preprocessing can be found in our KGMN manuscript.

**The step-by-step demonstration is provided as below.**

### 2.1 Download demo data and unzip the archive.

- All required intermediate files for visualization is provided in '06\_visualization' folder.

| 名称                                | 修改日期           | 类型                  | 大小       |
|-----------------------------------|----------------|---------------------|----------|
| 00_annotation_table               | 2022/6/4 15:36 | 文件夹                 |          |
| 02_result_MRN_annotation          | 2022/6/4 15:36 | 文件夹                 |          |
| 04_biology_intepretation          | 2022/6/4 15:36 | 文件夹                 |          |
| 05_analysis_report                | 2022/6/4 15:36 | 文件夹                 |          |
| 06_visualization                  | 2022/6/4 15:30 | 文件夹                 |          |
| data.csv                          | 2022/1/17 9:12 | Microsoft Excel ... |          |
| NIST_urine01_pos-NIST_urine01.mgf | 2022/1/17 9:10 | MGF 文件              |          |
| NIST_urine02_pos-NIST_urine02.mgf | 2022/1/17 9:12 | MGF 文件              |          |
| NIST_urine03_pos-NIST_urine03.mgf | 2022/1/17 9:12 | MGF 文件              |          |
| NIST_urine04_pos-NIST_urine04.mgf | 2022/1/17 9:10 | MGF 文件              |          |
| para_list.txt                     | 2022/6/4 15:33 | 文本文档                | 2 KB     |
| QC_pos-QC.mgf                     | 2022/1/17 9:12 | MGF 文件              | 9,687 KB |
| RT_recalibration_table.csv        | 2022/1/17 9:12 | Microsoft Excel ... | 1 KB     |
| sample.info.csv                   | 2022/1/17 9:12 | Microsoft Excel ... | 1 KB     |

  

|                                      |                |                    |          |
|--------------------------------------|----------------|--------------------|----------|
| list_peak_group                      | 2022/4/13 3:47 | 文件                 | 151 KB   |
| list_peak_group_annotation_concis... | 2022/4/13 3:28 | R Workspace        | 6,730 KB |
| ms2_data.msp                         | 2022/4/13 3:20 | Windows Install... | 1,318 KB |
| ms2_data.RData                       | 2022/4/13 3:21 | R Workspace        | 591 KB   |
| peak_group_id_table                  | 2022/4/13 3:45 | 文件                 | 38 KB    |
| table_identification                 | 2022/4/13 3:47 | 文件                 | 138 KB   |

## 2.2 Preparing.

- Set the working directory ('your\_path/06\_visualization') and load required packages. Then, please check required files whether existed.

### # load packages

```
library(MetDNA2Vis)
```

```
library(CHNOSZ)
```

```
library(dplyr)
```

### # check required files

```
checkFiles4Vis()
```

```
## Check required files ...
```

```
## Check required files: done!
```

## 2.3 Reconstruct and export global multi-layer networks.

### 2.3.1 Network 1

The network 1 is the knowledge-guided metabolic reaction network. For knowns, the KEGG reaction pair network is directly used. For unknowns, an extended KEGG reaction pair network is used. The network expansion is performed with in-silico enzymic reactions (via Biotransformer), and further connected with KEGG reaction pair network. The details of network construction and expansion are described in our KGMN manuscript. It should be noted that the KEGG reaction pair network and extended network are built in advance.

To export the network 1, it is easy to run `reconstructNetwork1` function as below:

```
# export network 1 for visualization
```

```
reconstructNetwork1(is_unknown_annotation = TRUE)
```

The networks files will be exported in '00\_network1' folder. It contains two files, including "edge\_table.tsv" and "node\_table.tsv" (Figure 2.3.1). These tables can be import into Cytoscape software for visualization.

| 名称             | 修改日期           | 类型     | 大小        |
|----------------|----------------|--------|-----------|
| edge_table.tsv | 2022/6/4 18:23 | TSV 文件 | 6,114 KB  |
| node_table.tsv | 2022/6/4 18:23 | TSV 文件 | 22,837 KB |

### 2.3.2 Network 2

The network 2 is a knowledge-guided MS/MS network. Although it calls MS/MS network, differing to MS/MS network (mainly based on MS2), the linkage (edge) of network2 has a prerequisite. It requires a reasonable reaction relationship and definitive structure candidate first. As a result, their retention time can also be predicted. In other words, two linked nodes indicate 4 messages. Their candidates of these nodes have (1) reasonable reaction relationships, (2) low m/z errors, (3) low RT error against with predicted RT values, and (4) MS/MS similarity. It should be note that optimized network2 required to be reconstructed from KGMN exported results, because the global peak correlation network remove and collapse some error nodes and edges in prior analysis. This process usually requires 10-20 min to complete.

To export the network 2, it is easily to run reconstructNetwork2 function as below:

```
# Modify format of KGMN result
```

```
annotation_table <- reformatTable1()
```

```
# Export global network2 files
```

```
reconstructNetwork2(annotation_table = annotation_table,
```

```
is_unknown_annotation = TRUE)
```

The networks files will be exported in '01\_network2' folder. The "edge\_table.tsv" and "node\_table.tsv" in this folder can be imported to Cytoscape.

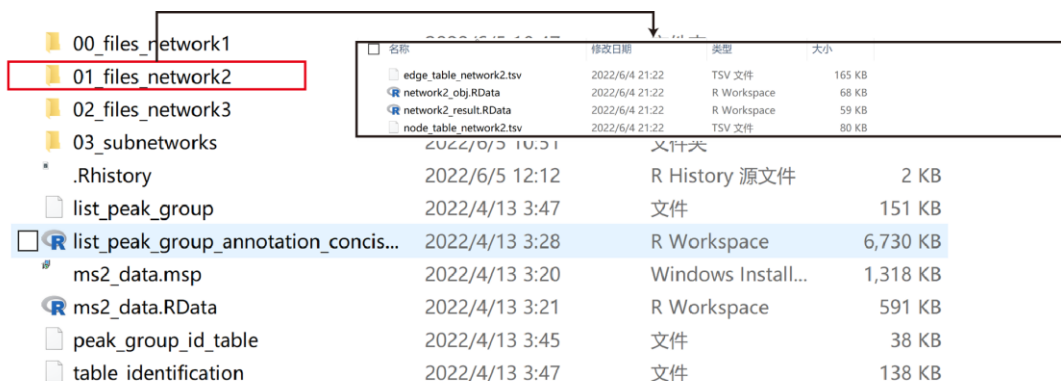

### 2.3.3 Network 3

The network 3 is the global peak correlation network. This network recognized different ion form peaks derived from peaks from network 2, including adducts, isotopes, neutral losses, and in-source fragments (ISF). The network 3 is used to optimize the annotation and linkage of network 2. The optimization has been completed in KGMN analysis. The details of network 3 construction and optimization can be found in our manuscript.

To export the network 3, it is easily to run reconstructNetwork3 function as below:

```
# export network3  
reconstructNetwork3()
```

The networks files will be exported in '02\_files\_network3' folder. The "edge\_table.tsv" and "node\_table.tsv" in this folder can be imported to Cytoscape for visualization.

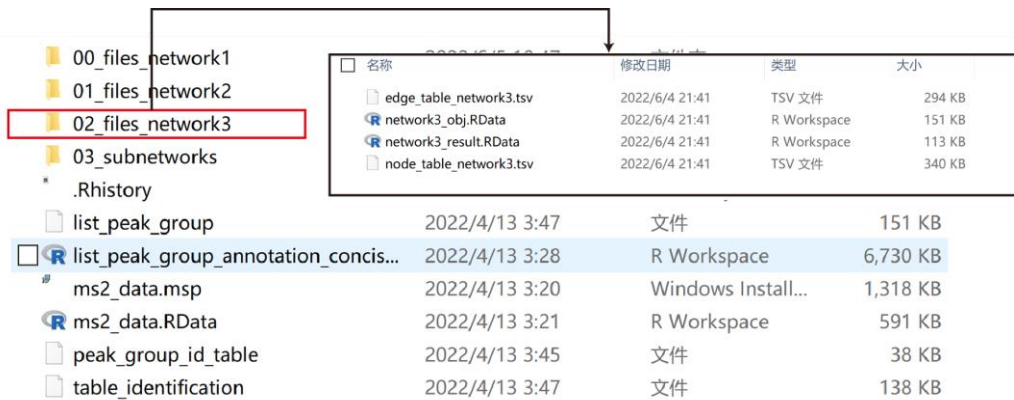

## 2.4 Visualize global networks with Cytoscape

Above networks (Network 1-3) can be imported to Cytoscape software tool for visualization. The process of network visualization is generally similar. Here, we use the above network 1 as a demonstration. The version of Cytoscape used here is 3.8.2.

**Below is the step-by-step instruction:**

1. **Import edge file.** Select the “edge\_table.tsv” file and open it in the box.

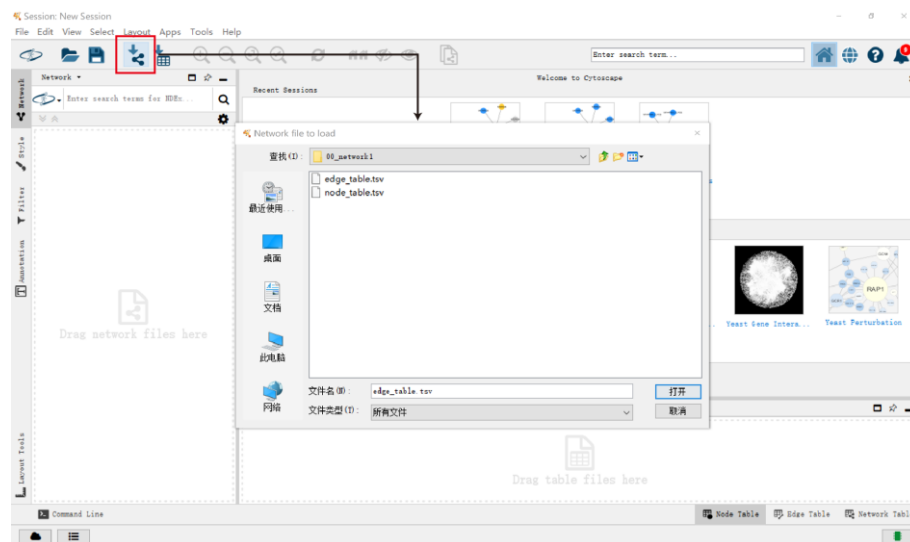

2. **Assign column attributes.** Click the ‘from’ column and select it as “source node”. Similarly, click the “to” column and select it as “target node”. After assigning attributes, click **OK** to construct a network.

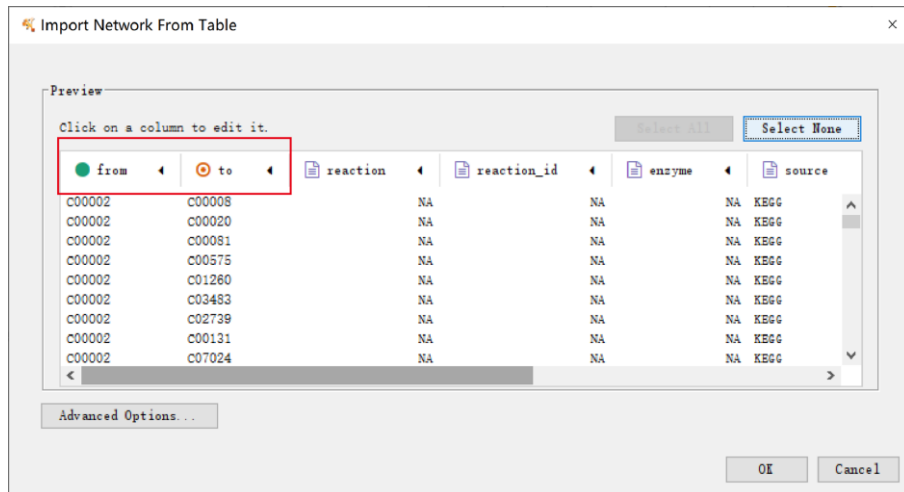

3. Import node file. Select the “node\_table.tsv” file and open it in the box.

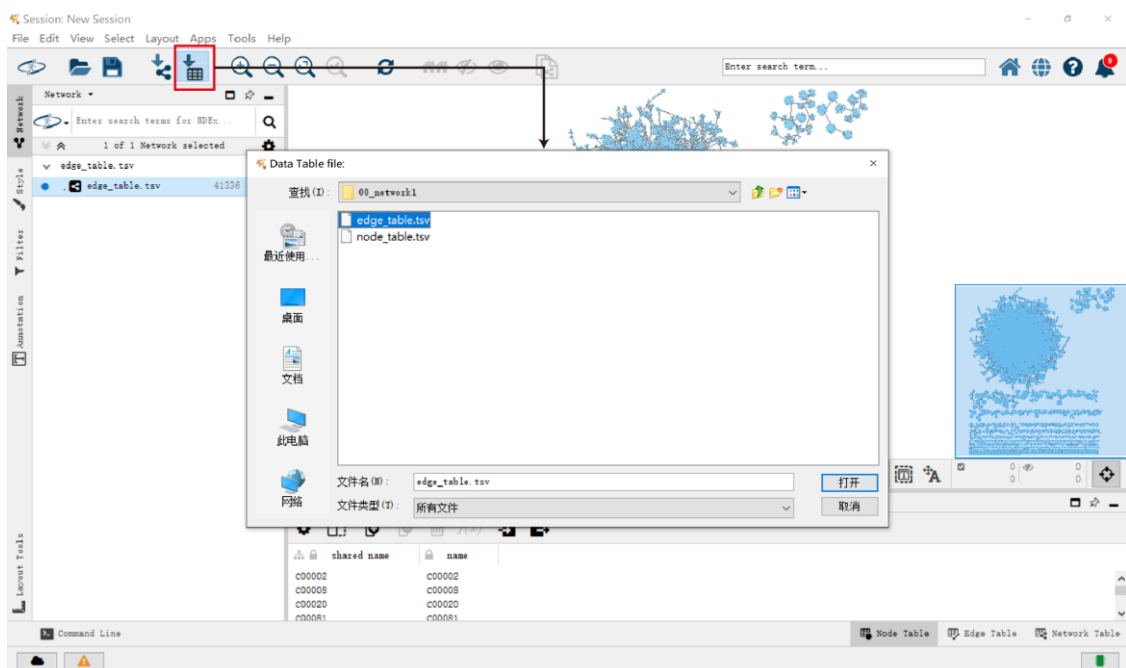

4. Select the “name” column as a key. Then, click the **OK** button.



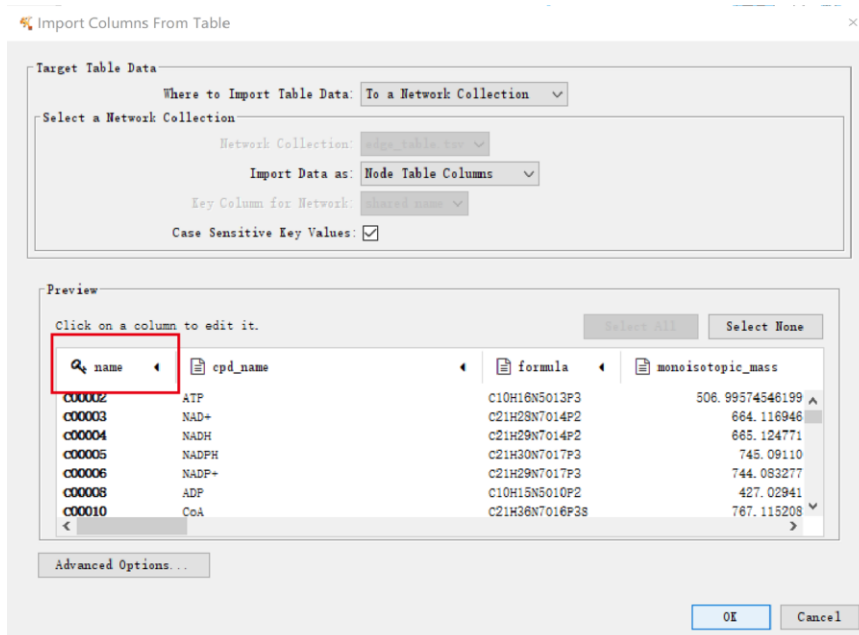

5. **Modify the style for visualization.** Click the Style type, you can adjust node shapes and colors, edge types and colors.

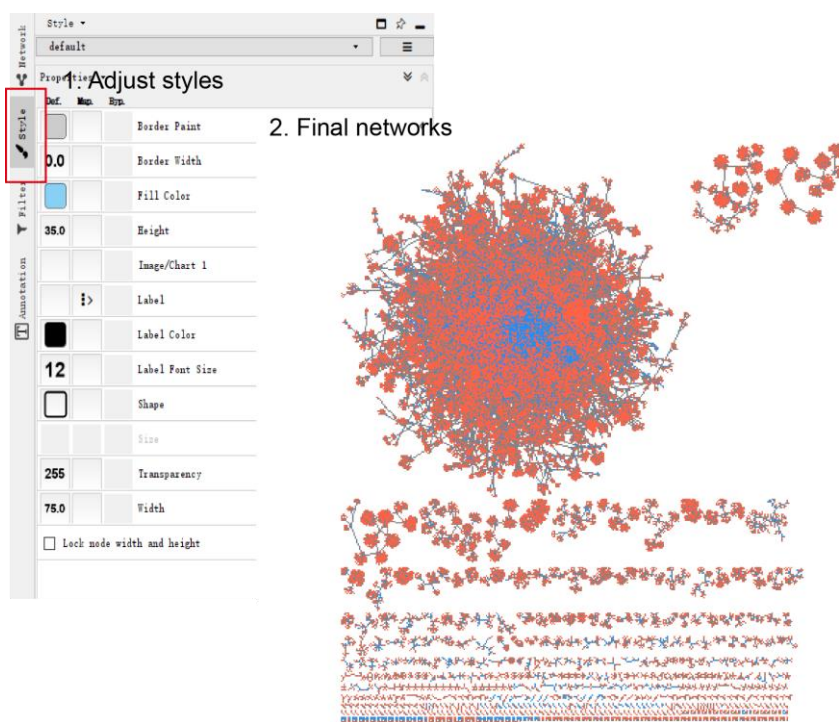

To help users reproduce our plot quickly, users can directly import our style file. The styles of different networks are provided [here](https://mega.nz/file/tnp1nKjT#LS1oPzcFzw6bbdsLSqGoW4Qggri_IM2LsPgsyZXilzQ) (https://mega.nz/file/tnp1nKjT#LS1oPzcFzw6bbdsLSqGoW4Qggri\_IM2LsPgsyZXilzQ).

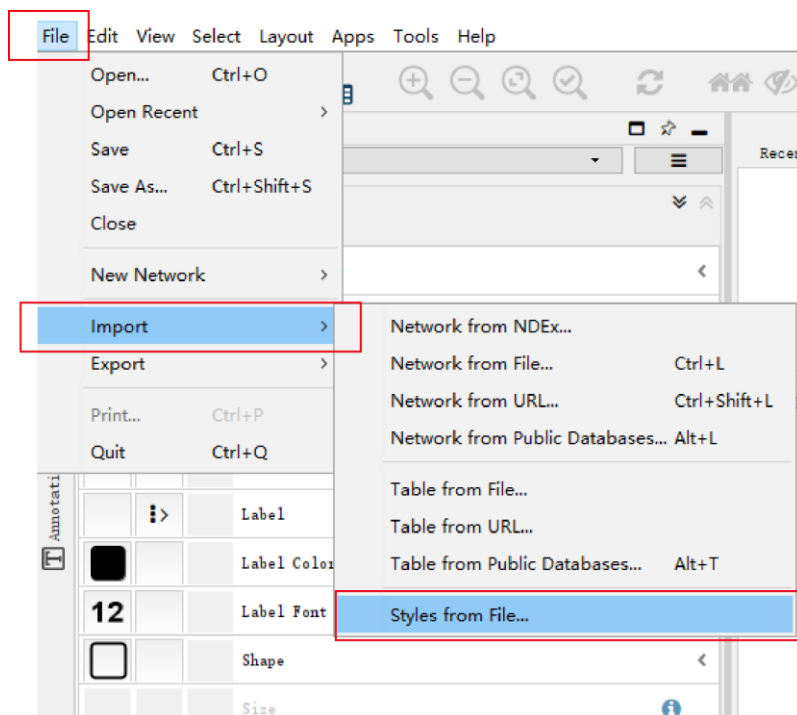

## 2.5 Select and export interesting subnetwork

Through above procedures, users can easily visualize global network 1-3. With such global networks, users can find interesting subnetworks in Cytoscape. The Cytoscape supports interactively investigation. **It should be note that the targeted subnetwork selection is customized.** Users can directly find interesting nodes from KGMN annotation results, or considering more information, like in-silico MS/MS, chemical structure and/or statistics analysis. For example, in KGMN manuscript, we combined MASST to select an unknown subnetwork of M262T526 (**Figure 5e in manuscript**). This unknown peak was putatively annotated as O-sulfotyrosine, and this annotation was from M182T541-Tyrosine. This subnetwork consisted of 2 peaks and 2 metabolites. Here, we mainly introduce how to export and visualize this subnetwork. First, export network 1 of this subnetwork. **Note:** the export and visualization require intermediate results from global networks. Therefore, please run global peaks export first. To export the subnetwork 1, please directly run retrieveSubNetwork1 function as below.

```
# network 1 of unknown peak subnetwork
```

```
# Note: the folder_output should keep same among different layer subnetworks
```

```
retrieveSubNetwork1(centric_met = c('C00082', 'KeggExd000923'),
```

```
is_unknown_annotation = TRUE,
```

```
folder_output = c('M182T541_M262T526'))
```

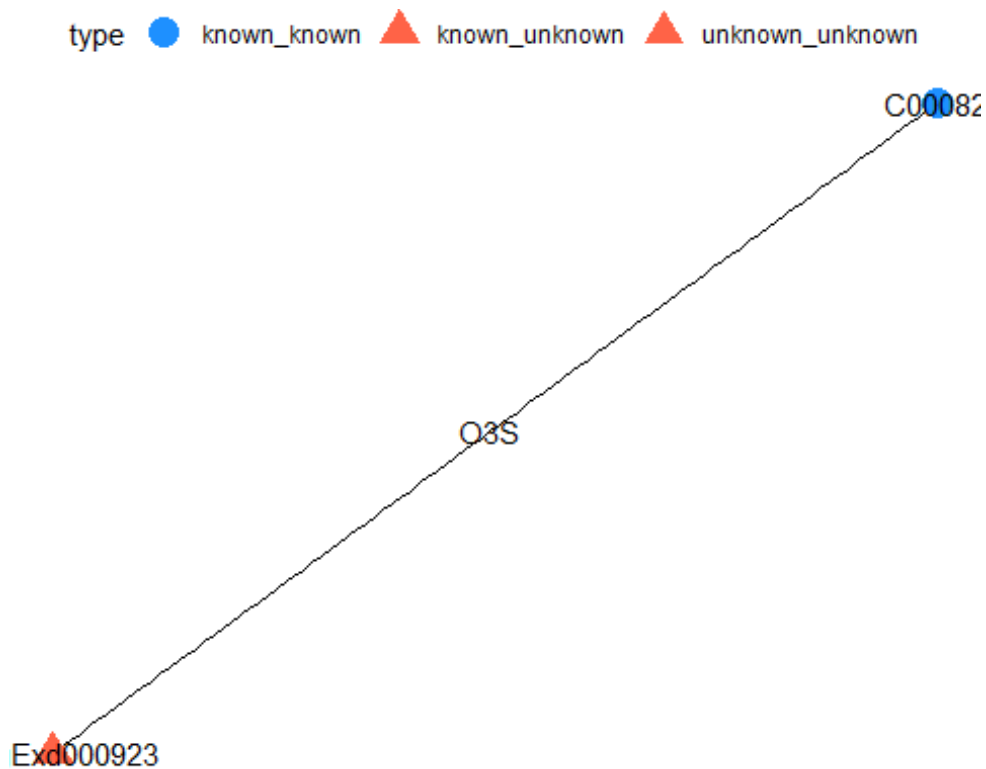

The networks files will be exported in ‘03\_subnetworks/your\_defined\_folder/network 1’ folder. Here, the exported folder is “M182T541\_M262T526”. The “edge\_table.tsv” and “node\_table.tsv” in this folder can be imported to Cytoscape for visualization. **Note:** if you run in RStudio, the preview plot of subnetwork 1 will be directly shown in the plot panel.

Similarly, export network 2 and network 3 of this subnetwork can be completed through running `retrieveSubNetwork2` and `retrieveSubNetwork3` functions, respectively. The preview plots of subnetwork 2 and subnetwork 3 will be shown in the plot panel if you run in RStudio.

```
# network 2 of unknown peak subnetwork
```

```
retrieveSubNetwork2(from_peak = 'M182T541',
  end_peak = 'M262T526',
  folder_output = c('M182T541_M262T526'))
```

```
## Using `sugiyama` as default layout
```

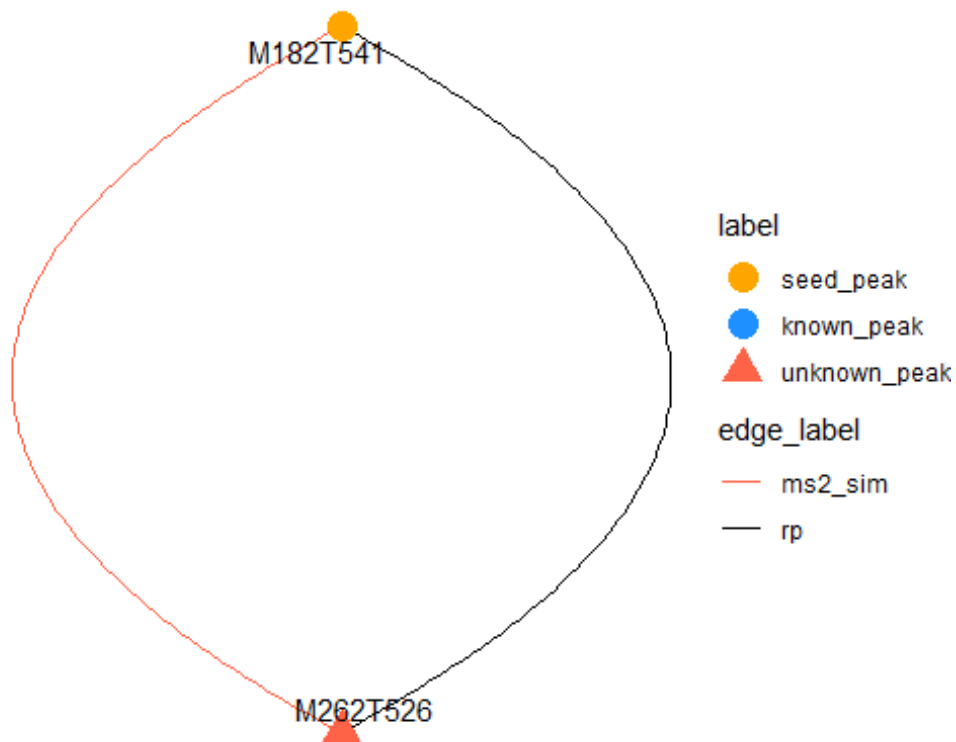

```
# network 3 of unknown peak subnetwork
```

```
retrieveSubNetwork3(base_peaks = c('M182T541', 'M262T526'),
```

```
base_adducts = c('[M+H]+', '[M+H]+'),
```

```
folder_output = c('M182T541_M262T526'))
```

```
## Using `stress` as default layout
```

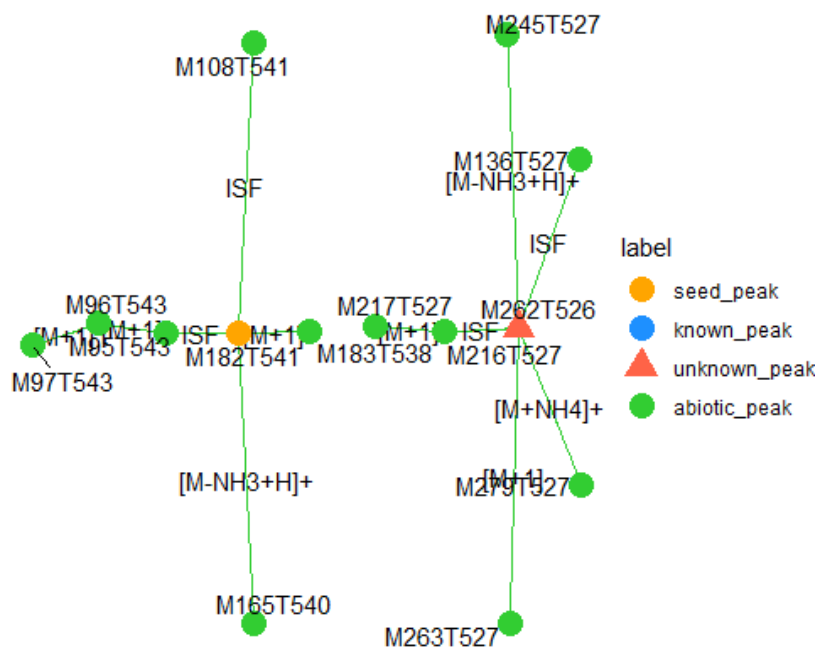



|                   |                |                    |          |
|-------------------|----------------|--------------------|----------|
| 00_files_network1 | 2022/6/5 10:47 | 文件夹                |          |
| 01_files_network2 | 2022/6/4 21:22 | 文件夹                |          |
| 02_files_network3 | 2022/6/4 21:41 | 文件夹                |          |
| 03_subnetworks    | 2022/6/5 10:51 | 文件夹                |          |
| .Rhistory         | 2022/6/5 12:12 | R History 源文件      | 2 KB     |
| list_peak_g       |                | 名称                 | 修改日期     |
| list_peak_g       |                | 类型                 | 大小       |
| M182T541_M262T526 | 2022/6/5 11:44 | 文件夹                | 6,730 KB |
| ms2_data.msp      | 2022/4/13 3:20 | Windows Install... | 1,318 KB |
| ms2_data.RData    | 2022/4/13 3:21 | R Workspace        | 591 KB   |
| peak_grou         |                | 名称                 | 修改日期     |
| table_ider        |                | 类型                 | 大小       |
| network_merge     | 2022/6/5 11:44 | 文件夹                |          |
| network1          | 2022/6/5 10:51 | 文件夹                |          |
| network2          | 2022/6/5 11:27 | 文件夹                |          |
| network3          | 2022/6/5 11:30 | 文件夹                |          |

### 3. The script for visualization

Here is a script which contains above codes to help to reproduce above analysis quickly.

```
# load packages
```

```
library(CHNOSZ)
```

```
library(dplyr)
```

```
library(MetDNA2Vis)
```

```
# set working directory
```

```
setwd('D:/project/00_zhulab/01_metdna2/00_data/20220602_visualization_kgmn/Demo_MetDNA2_NIST_urine_pos/06_visualization/')
```

```
# Export global networks
```

```
# construct network 1
```

```
reconstructNetwork1(is_unknown_annotation = TRUE)
```

```
# construct network 2
```

```
annotation_table <- reformatTable1()
```

```
reconstructNetwork2(annotation_table = annotation_table)
```

```
# construct network 3
```

```
reconstructNetwork3()
```

```
# Export subnetworks -----
# network 1 of unknown peak subnetwork
# Note: the folder_output should keep same among different layer subnetworks
retrieveSubNetwork1(centric_met = c('C00082', 'KeggExd000923'),
  is_unknown_annotation = TRUE,
  folder_output = c('M182T541_M262T526'))

# network 2 of unknown peak subnetwork
retrieveSubNetwork2(from_peak = 'M182T541',
  end_peak = 'M262T526',
  folder_output = c('M182T541_M262T526'))

# network 3 of unknown peak subnetwork
retrieveSubNetwork3(base_peaks = c('M182T541', 'M262T526'),
  base_adducts = c('[M+H]+', '[M+H]+'),
  folder_output = c('M182T541_M262T526'))

# merge subnetwork
mergeSubnetwork(from_peak = 'M182T541',
  end_peak = 'M262T526',
  folder_output = 'M182T541_M262T526')
```

## Supplementary Note 2.

# Tutorial of validating KGMN unknowns with repository mining

Zhiwei Zhou

2022-06-13

This tutorial aims to help users to select and validate their interesting unknown peaks from KGMN through repository mining. In the manuscript, we mainly used **MASST** to perform repository mining. The MASST<sup>1</sup> is a tool to query spectrum in context of where it occurs against all GNPS data sets. In this tutorial, we focus on demonstrating how to combine KGMN results and MASST. The detail instructions of MASST can be found in **GNPS document** (<https://ccms-ucsd.github.io/GNPSDocumentation/masst/>).

The step-by-step instruction has been provided below.

### 1. Data preparing.

In this workflow, the data files require KGMN (MetDNA2) processed firstly. Here, we utilized NIST human urine data set as example. The data set has been analyzed with KGMN (v1.0.4), and the results can be downloaded [here](https://mega.nz/file/8v50iL6T#oILf8wIVJU_iqTfjcOtH1TRHhnP1GGbvG_ZNb1xniGc) ([https://mega.nz/file/8v50iL6T#oILf8wIVJU\\_iqTfjcOtH1TRHhnP1GGbvG\\_ZNb1xniGc](https://mega.nz/file/8v50iL6T#oILf8wIVJU_iqTfjcOtH1TRHhnP1GGbvG_ZNb1xniGc)).

The folders should look like as below:

| Name                              | Date modified     | Type                 | Size     |
|-----------------------------------|-------------------|----------------------|----------|
| 00_annotation_table               | 6/6/2022 2:54 PM  | File folder          |          |
| 02_result_MRN_annotation          | 6/6/2022 2:54 PM  | File folder          |          |
| 04_biology_intepretation          | 6/4/2022 3:36 PM  | File folder          |          |
| 05_analysis_report                | 6/6/2022 2:54 PM  | File folder          |          |
| 06_visualization                  | 6/6/2022 2:54 PM  | File folder          |          |
| data.csv                          | 1/17/2022 9:12 AM | Microsoft Excel C... | 2,385 KB |
| NIST_urine01_pos-NIST_urine01.mgf | 1/17/2022 9:10 AM | MGF File             | 9,877 KB |
| NIST_urine02_pos-NIST_urine02.mgf | 1/17/2022 9:12 AM | MGF File             | 9,895 KB |
| NIST_urine03_pos-NIST_urine03.mgf | 1/17/2022 9:12 AM | MGF File             | 9,921 KB |
| NIST_urine04_pos-NIST_urine04.mgf | 1/17/2022 9:10 AM | MGF File             | 9,936 KB |
| para_list.txt                     | 6/4/2022 3:33 PM  | Text Document        | 2 KB     |
| QC_pos-QC.mgf                     | 1/17/2022 9:12 AM | MGF File             | 9,687 KB |
| RT_recalibration_table.csv        | 1/17/2022 9:12 AM | Microsoft Excel C... | 1 KB     |
| sample.info.csv                   | 1/17/2022 9:12 AM | Microsoft Excel C... | 1 KB     |



The users can browser and select interesting known/unknown peaks in the **annotation table** “**table1\_identification.csv**” in the “00\_annotation\_table” folder. It should be note that the selection of targeted peak is customized.

For demonstration, we utilized the unknown peak M262T526 as an example (Figure 5d in manuscript). The MS/MS spectrum of this peak can be found in the “**ms2\_data.msp**” in “06\_visualization” folder. You can open it with text tool (e.g. Notepad++).

```
7925 NAME: M262T526
7926 PRECURSORMZ: 262.0367
7927 IONMODE: positive
7928 RETENTIONTIME: 526.026
7929 Links:
7930 Comment:
7931 Num Peaks: 8
7932 85.0256 196
7933 91.0503 2509
7934 119.0454 2981
7935 123.0441 1145
7936 136.0722 15907
7937 147.0421 383
7938 165.0539 225
7939 216.0298 1549
```

## 2. Upload and analysis in MASST.

Users can upload this file to MASST (<https://gnps.ucsd.edu/ProteoSAFe/static/gnps-splash.jsp?redirect=auth>) to perform repository mining. The users need to login first. Then, click the “**query spectrum**” button in MASST panel to start the analysis. Copy **related texts from MSP** file to “title”, “precursor m/z”, “spectrum input” panel in the web server, respectively.

### Workflow Selection

Search Protocol:

Title:

### Workflow Description

#### SEARCH\_SINGLE\_SPECTRUM

Use MASST to query a single MS/MS spectrum across all public GNPS datasets. The mass spectrometry equivalent of NCBI BLAST helps to put the query spectrum in context of where else it occurs (including sample information) as well as search a single MS/MS spectrum against all public spectral libraries.

Workflow version release\_29

### Spectrum Input

Precursor M/Z:

Spectrum Input:

Modify the search parameters and click “submit” button. The **used parameters** in KGMN manuscript have been provided below.

**Search Options**

Find Related Datasets:  Select Databases to Search:

Parent Mass Tolerance:  Da Ion Tolerance:  Da

Min Matched Peaks:  Score Threshold:

---

**Advanced Search Options** Hide Fields

Library Class:  Search Analogs:

Search Unclustered Data:  Create Network:

Top Hits Per Spectrum:  Maximum Analog Search Mass Difference:

Spectral Library:  0 files and 1 folder are selected

---

**Advanced Filtering Options** Hide Fields

Filter StdDev Intensity:  Filter SNR Intensity:  Min Peak Int:

Filter Precursor Window:  Filter Library:

Filter peaks in 50Da Window:

---

**Workflow Submission**

Email me at

When the job finished, you will receive an email with a link. You can view and download results in the webserver.

- Matched data set: Dataset Matches → View File Matches → Download

The screenshot shows a workflow status page for 'SEARCH\_SINGLE\_SPECTRUM (version release\_29)'. The workflow is 'DONE'. A red box labeled 'a' highlights the 'Community Matches [Dataset Matches]' link. An arrow points from this link to a table of matches. A red box labeled 'b' highlights the 'Download' button in the table's header.

| View              | Filter By: | View Dataset | Title | Description                                                    | Organism                                       | Confine Score                          | Matched Peaks | ΔZ Delta | NumFiles | View File Matches in GPM5 |                   |
|-------------------|------------|--------------|-------|----------------------------------------------------------------|------------------------------------------------|----------------------------------------|---------------|----------|----------|---------------------------|-------------------|
| View Mirror Match | USI Links  | 1            | View  | GNPS - Tomato Endophyte Positive Mode                          | Tomato Endophyte positive mode - trusafa - Q   | Solanum lycopersicum (NCBI/Taxon:4081) | 0.93          | 7        | 0.00     | 11                        | View File Matches |
| View Mirror Match | USI Links  | 2            | View  | GNPS - R_HAN_C13B mice fed with probiotics or antibiotics 0W   | Executive                                      |                                        |               |          |          |                           |                   |
| View Mirror Match | USI Links  | 3            | View  | GNPS - R_HAN_01 05 mice sera fed with probiotic or antibiotics |                                                |                                        |               |          |          |                           |                   |
|                   |            |              |       |                                                                | Neotoma muscivora domestica (NCBI/Taxon:10252) | 0.51                                   | 6             | 0.00     | 2        | View File Matches         |                   |
|                   |            |              |       |                                                                | Mus musculus (NCBI/Taxon:10296)                | 0.91                                   | 6             | 0.00     | 2        | View File Matches         |                   |

- Matched files: Dataset Matches → View File Matches → Download

The screenshot shows the GNPS workflow interface. At the top, the job status is 'SEARCH\_SINGLE\_SPECTRUM (version release\_29)'. Below this, there are options to 'DONE', 'Clone', 'View All Library Hits', 'Community Matches', and 'Dataset Matches'. A red box labeled 'a' highlights the 'Community Matches' and 'Dataset Matches' section. Below this, there is a table of search results with columns for 'Title', 'Description', 'Organism', 'Cosine Score', 'Matched Peaks', 'MS Error', and 'Specs'. A red box labeled 'b' highlights the 'View File Matches in GNPS' link in the table. Below the table, there are options to 'Download' and 'Download Option: Tab-Delimited Result Table'. A red box labeled 'c' highlights the 'Download' button. Below this, there is another table with columns for 'dataset\_id', 'dataset\_scan', 'filename', 'View Metadata', 'View Chromatogram (Beta)', and 'File Metadata'. A red box labeled 'c' highlights the 'Download' button in this section.

### 3. Result interpretation and visualization.

The downloaded results include 2 ZIP files, “view\_all\_datasets\_matched.zip” and “view\_all\_file\_datasets\_matched.zip”. The files in packages can be further opened with Microsoft Office Excel or other program tools (e.g. R, Python).

- The table of “view\_all\_datasets\_matched” contains meta information of appeared data sets, like “dataset description”, “dataset id”, “dataset organisms” and “files count”.

Furthermore, we can conclude the species and sample information based on the dataset description. For our examples, it was appeared in 7 datasets, and 3 organisms (where genipapo is from human urine actually according to the data set description).

|   | A                        | B                                      | C            | D                          | E          | F             | G           | H        | I       | J        | K           | L          |
|---|--------------------------|----------------------------------------|--------------|----------------------------|------------|---------------|-------------|----------|---------|----------|-------------|------------|
| 1 | dataset_description      | dataset_filename                       | dataset_id   | dataset_organisms          | dataset_sc | dataset_title | files_count | matchedp | mzerror | score    | specs_filer | specs_scan |
| 2 | Tomato Endophyte Po      | continuous/clustered_data/MSV000081463 | MSV000081463 | Solanum lycopersicum (NCBI | 5708       | GNPS - Torr   | 11          | 7        | 0.00129 | 0.926225 | specs_ms.   | 1          |
| 3 | Mice were fed with pre   | continuous/clustered_data/MSV000084107 | MSV000084107 | Mus musculus domesticus (N | 11528      | GNPS - R_H    | 2           | 6        | 0.00129 | 0.914833 | specs_ms.   | 1          |
| 4 | Control diet for C57Bl/  | continuous/clustered_data/MSV000084062 | MSV000084062 | Mus musculus (NCBITaxon:10 | 11496      | GNPS - R_H    | 2           | 6        | 0.00129 | 0.914833 | specs_ms.   | 1          |
| 5 | NIST SRM-1950 was pi     | continuous/clustered_data/MSV000081364 | MSV000081364 | Homo sapiens (NCBITaxon:96 | 7340       | GNPS - NIS    | 6           | 7        | 0.00129 | 0.847013 | specs_ms.   | 1          |
| 6 | Datasets of 2 patients i | continuous/clustered_data/MSV000086207 | MSV000086207 | Homo sapiens (NCBITaxon:96 | 435        | GNPS R_CO     | 6           | 5        | 0.0017  | 0.780397 | specs_ms.   | 1          |
| 7 | notworking urines of c   | continuous/clustered_data/MSV000081957 | MSV000081957 | Genipapo                   | 765        | GNPS Genip    | 6           | 6        | 0.00129 | 0.77843  | specs_ms.   | 1          |
| 8 | pilot data from a drug   | continuous/clustered_data/MSV000082493 | MSV000082493 | Homo sapiens (NCBITaxon:96 | 87207      | GNPS_DrugI    | 8           | 4        | 0.00129 | 0.715487 | specs_ms.   | 1          |

- The table of “view\_all\_file\_datasets\_matched” contains names of matched files. Each file can be viewed online through the filename in GNPS dashboard (<https://gnps-lcms.ucsd.edu/>), while the files and dataset can be accessed in GNPS datasets (<https://gnps.ucsd.edu/ProteoSAFe/datasets.jsp>).

|    | A                        | B             | C            | D                                                    | E        |
|----|--------------------------|---------------|--------------|------------------------------------------------------|----------|
| 1  | basefilename             | cluster_score | dataset_id   | filename                                             | metadata |
| 2  | 018c.mzML                | 435           | MSV000086207 | f.MSV000086207/ccms_peak/018c.mzML                   |          |
| 3  | 018b.mzML                | 435           | MSV000086207 | f.MSV000086207/ccms_peak/018b.mzML                   |          |
| 4  | 018a.mzML                | 435           | MSV000086207 | f.MSV000086207/ccms_peak/018a.mzML                   |          |
| 5  | 017c.mzML                | 435           | MSV000086207 | f.MSV000086207/ccms_peak/017c.mzML                   |          |
| 6  | 017b.mzML                | 435           | MSV000086207 | f.MSV000086207/ccms_peak/017b.mzML                   |          |
| 7  | 017a.mzML                | 435           | MSV000086207 | f.MSV000086207/ccms_peak/017a.mzML                   |          |
| 8  | E12_3.mzML               | 11528         | MSV000084107 | f.MSV000084107/ccms_peak/E12_3.mzML                  |          |
| 9  | E12_2.mzML               | 11528         | MSV000084107 | f.MSV000084107/ccms_peak/E12_2.mzML                  |          |
| 10 | E12_3.mzML               | 11496         | MSV000084062 | f.MSV000084062/ccms_peak/E12_3.mzML                  |          |
| 11 | E12_2.mzML               | 11496         | MSV000084062 | f.MSV000084062/ccms_peak/E12_2.mzML                  |          |
| 12 | DM000088099_RB7_01_29    | 87234         | MSV000082493 | f.MSV000082493/ccms_peak/urine/DM000088099_RB7_01_29 |          |
| 13 | DM000086580_RF12_01_2    | 87207         | MSV000082493 | f.MSV000082493/ccms_peak/urine/DM000086580_RF12_01_2 |          |
| 14 | DM000078719_RA11_01_2    | 87214         | MSV000082493 | f.MSV000082493/ccms_peak/urine/DM000078719_RA11_01_2 |          |
| 15 | DM000078708_RC10_01_2    | 87214         | MSV000082493 | f.MSV000082493/ccms_peak/urine/DM000078708_RC10_01_2 |          |
| 16 | DM000078265_RD7_01_29    | 87207         | MSV000082493 | f.MSV000082493/ccms_peak/urine/DM000078265_RD7_01_29 |          |
| 17 | DM000076834_RB8_01_29    | 87230         | MSV000082493 | f.MSV000082493/ccms_peak/urine/DM000076834_RB8_01_29 |          |
| 18 | DM000076821_RC12_01_2    | 87234         | MSV000082493 | f.MSV000082493/ccms_peak/urine/DM000076821_RC12_01_2 |          |
| 19 | DM000076799_RC8_01_29    | 87230         | MSV000082493 | f.MSV000082493/ccms_peak/urine/DM000076799_RC8_01_29 |          |
| 20 | Urine83_Juice_12h_Top3_F | 765           | MSV000081957 | f.MSV000081957/ccms_peak/Urine83_Juice_12h_Top3_F    |          |

With above information, it would be easy to reproduce figures of repository validation. The result of above example can be downloaded [here](https://mega.nz/file/R6oCiITS#L8uZQnjb4wx65luVnWvcCKXL8ZIPLM36ExyvXR7aY3E) (https://mega.nz/file/R6oCiITS#L8uZQnjb4wx65luVnWvcCKXL8ZIPLM36ExyvXR7aY3E).

# Tutorial of integrating KGMN results with other in-silico MS/MS workflows

Zhiwei Zhou

2022-06-10

## Introduction

**Knowledge-guided multi-layer network (KGMN)** is a new approach leveraging knowledge-guided multi-layer networks to annotate known and unknown metabolites in untargeted metabolomics data. Although KGMN is an independent software tool, it can further integrate with other workflows to help users discover and validate metabolites. This tutorial aims to provide an easy instruction to integrated KGMN results with 3 common in-silico MS/MS tools (MetFrag, CFM-ID, MS-FINDER).

Here, we mainly focus on providing ways to help users linking KGMN with other tools. It should be note that the parameters need to be adjusted according to their instrument settings and experimental designs. **The detailed usage please refer their own tutorials.**

## Tutorials:

- MetFrag: <https://ipb-halle.github.io/MetFrag/>
- CFM-ID: <https://cfmid.wishartlab.com/>
- MSFINDER: <https://mtbinfo-team.github.io/mtbinfo.github.io/MS-FINDER/tutorial.html>

## Demo datasets:

- NIST urine set (Positive mode, processed by KGMN): [Download](#)  
([https://mega.nz/file/w7ZnjLAa#u4Dj5lhkYyEhOZHH4BX\\_HUHvGMkjZ\\_ti5bn986tgyrY](https://mega.nz/file/w7ZnjLAa#u4Dj5lhkYyEhOZHH4BX_HUHvGMkjZ_ti5bn986tgyrY))

If you use these tools, please cite their papers (MetFrag<sup>2</sup>, CFM-ID<sup>3</sup>, MSFINDER<sup>4</sup>).

## 1. Installation.

This integration of KGMN and in-silico MS/MS tools is mainly performed by R package "MetDNA2InSilicoTool". It can be downloaded as below:

```
# Install required packages
if(!require(devtools)){
install.packages("devtools")
}

if(!require(BiocManager)){
install.packages("BiocManager")
}

# Install CRAN/Bioconductor packages
required_pkgs <- c("dplyr","tidyr","readr","stringr","rcdk")
list_installed <- installed.packages()

new_pkgs <- required_pkgs[!(required_pkgs %in% list_installed[, 'Package'])]
if (length(new_pkgs) > 0) {
  BiocManager::install(new_pkgs)
} else {
  cat("Required CRAN/Bioconductor packages installed\n")
}

# Install GitHub packages - call MetFrag
devtools::install_github("schymane/ReSOLUTION")

# Install GitHub packages
devtools::install_github("ZhuMetLab/MetDNA2InSilicoTool")
```

## 2. MetFrag

**MetFrag** is a common in-silico MS/MS tool developed by *Dr. Sebastian Wolf* and *Dr. Christoph Ruttkies*. It provides multiple ways to use it, including web server (MetFragWeb), MetFrag

commandline tool (MetFragCL) and R package (MetFragR). In this workflow, we mainly use **MetFragCL (version 2.4.5)** to demonstrate the connection between KGMN and MetFrag.

### 2.1 Download MetFragCL program.

MetFragCL is a Java Archive File. It can be downloaded from GitHub. <https://github.com/ipb-halle/MetFragRelaunched/releases/tag/v2.4.8>

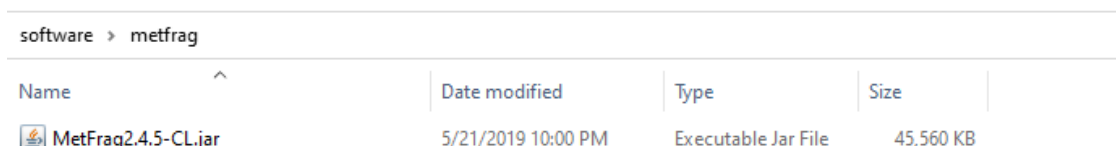

The screenshot shows a file browser interface with a breadcrumb path 'software > metfrag'. Below the path is a table with columns: Name, Date modified, Type, and Size. A single file is listed: 'MetFrag2.4.5-CL.jar' with a date of '5/21/2019 10:00 PM', type 'Executable Jar File', and size '45,560 KB'.

| Name                                                                                                  | Date modified      | Type                | Size      |
|-------------------------------------------------------------------------------------------------------|--------------------|---------------------|-----------|
|  MetFrag2.4.5-CL.jar | 5/21/2019 10:00 PM | Executable Jar File | 45,560 KB |

**Note:** The MetFragCL program is depended on **Java**. Please install java and set environment variable first.

### 2.2 Load required packages, and setting the working directory.

We use MetDNA2InSilicoTool to call MetFragCL. Please set the working directory at 07\_insilico\_msms, which is localized at KGMN result folder. Then, load some required packages.

```
# set working directory
setwd('G:/00_projects/03_MetDNA2/00_data/20220609_insilico_ms2_demo/NIST_urine_pos/07_insilico_msms/')

# load packages
library(dplyr)
library(MetDNA2InSilicoTool)

# reformat identification_table
reformatTable1(dir_path =
'G:/00_projects/03_MetDNA2/00_data/20220609_insilico_ms2_demo/NIST_urine_pos/07_insilico_msms/')
```

It looks like as below:



| Name                 | Date modified     | Type                  | Size     |
|----------------------|-------------------|-----------------------|----------|
| ms2_data.msp         | 4/13/2022 3:20 AM | Windows Installer ... | 1,318 KB |
| ms2_data.RData       | 4/13/2022 3:21 AM | R Workspace           | 591 KB   |
| table_identification | 6/9/2022 11:42 PM | File                  | 211 KB   |

### 2.3 Generate input files for your interested peak.

In this workflow, users need generate necessary files for different in-silico tools. Here, we use an interesting peak **M196T420** as example (Figure 4c). This peak is annotated as an unknown peak in KGMN, while it has 6 possible metabolite candidates.

First, generate necessary file for M196T420.

```
# generate files for in-silico MS/MS match
```

```
# peak 'M196T420' as example
```

```
generateFiles4InsilicoMsMs(peak_id = 'M196T420',
```

```
dir_path =
```

```
'G:/00_projects/03_MetDNA2/00_data/20220609_insilico_ms2_demo/NIST_urine_pos/07_insilico_msms/')
```

A folder “M196T420” will be created as blow:

| Name                 | Date modified      | Type                  | Size     |
|----------------------|--------------------|-----------------------|----------|
| M196T420             | 6/10/2022 12:04 PM | File folder           |          |
| ms2_data.msp         | 4/13/2022 3:20 AM  | Windows Installer ... | 1,318 KB |
| ms2_data.RData       | 4/13/2022 3:21 AM  | R Workspace           | 591 KB   |
| table_identification | 6/10/2022 12:02 PM | File                  | 211 KB   |

  

| Name               | Date modified      | Type                 | Size |
|--------------------|--------------------|----------------------|------|
| candidate_list     | 6/10/2022 12:04 PM | File                 | 1 KB |
| candidate_list.csv | 6/10/2022 12:04 PM | Microsoft Excel C... | 2 KB |
| ms2                | 6/10/2022 12:04 PM | File                 | 1 KB |
| ms2.mgf            | 6/10/2022 12:04 PM | MGF File             | 1 KB |

It contains two files, candidate\_list and MS/MS file. The **candidate list** is a list of chemical structures for in-silico MS/MS tool validation. The **MS/MS file** is a experimental spectrum of the targeted peak. The MS/MS file can be used for other in-silico tools if needed.

## 2.4 Run MetFrag.

We provide a R function (`runMetFragMatch`) to call MetFragCL. Here, the path of MetFragCL should be given. Other parameters can be adjusted. In MetDNA2InSilicoTool package, we only open limited parameters. For advanced users, the parameters can be adjusted according to [MetFragCL tutorial](#).

```
# run MetFrag

# parameters
# peak_id: name of interested peak
# metfrag_path: path of metfrag program
# ppm: relative error of precursor MS1. 25 ppm
# mzabs: absolute error or MS1. 0.01 Da
# frag_ppm: relative error of precursor MS1. 25 ppm

runMetFragMatch(peak_id = 'M196T420',
                 dir_path =
'G:/00_projects/03_MetDNA2/00_data/20220609_insilico_ms2_demo/NIST_urine_pos/07_insilico_
msms/',
                 metfrag_path = 'F:/software/metfrag/MetFrag2.4.5-CL.jar',
                 ppm = 25,
                 mzabs = 0.01,
                 frag_ppm = 25)
```

## 2.5 Output of MetFrag.

A folder “01\_metfrag” is created in the “M196T420” folder. It contains results of MetFrag. For candidate with different adducts, they are divided into different folders. The rank results localize at the subfolder “results”.

00\_projects > 03\_MetDNA2 > 00\_data > 20220609\_insilico\_ms2\_demo > NIST\_urine\_pos > 07\_insilico\_msms > M196T420 > 01\_metfrag >

| Name                 | Date modified      | Type                 | Size |
|----------------------|--------------------|----------------------|------|
| [M+H] <sup>+</sup>   | 6/10/2022 12:23 PM | File folder          |      |
| [M+Na] <sup>+</sup>  | 6/10/2022 12:23 PM | File folder          |      |
| local_db_metfrag.csv | 6/10/2022 12:23 PM | Microsoft Excel C... | 2 KB |
| peak_list.txt        | 6/10/2022 12:23 PM | Text Document        | 1 KB |

00\_projects > 03\_MetDNA2 > 00\_data > 20220609\_insilico\_ms2\_demo > NIST\_urine\_pos > 07\_insilico\_msms > M196T420 > 01\_metfrag > [M+H]<sup>+</sup> >

| Name    | Date modified      | Type        | Size |
|---------|--------------------|-------------|------|
| config  | 6/10/2022 12:23 PM | File folder |      |
| results | 6/10/2022 12:23 PM | File folder |      |

00\_projects > 03\_MetDNA2 > 00\_data > 20220609\_insilico\_ms2\_demo > NIST\_urine\_pos > 07\_insilico\_msms > M196T420 > 01\_metfrag > [M+H]<sup>+</sup> > results

| Name             | Date modified      | Type                 | Size |
|------------------|--------------------|----------------------|------|
| metfrag_rank.csv | 6/10/2022 12:23 PM | Microsoft Excel C... | 3 KB |

### 3. CFM-ID

CFM-ID is a machine-learning based MS/MS prediction tool, which developed by *Prof. David S Wishart Lab*. It provides several access ways, including web server and command lines. In this workflow, we mainly use CFM-ID (version 2.4) to demonstrate the connection between KGMN and CFM-ID

#### 3.1 Download and Set CFM-ID program.

Here, we utilize CFM-ID (v2.4). The program can be downloaded at [here](https://sourceforge.net/projects/cfm-id/files/) (<https://sourceforge.net/projects/cfm-id/files/>). The new docker image of CFM-ID4 is available at [here](https://bitbucket.org/wishartlab/cfm-id-code/src/master/) (<https://bitbucket.org/wishartlab/cfm-id-code/src/master/>).

software > cfm\_id >

| Name                   | Date modified       | Type                 | Size     |
|------------------------|---------------------|----------------------|----------|
| metab_se_cfm           | 8/3/2021 3:24 PM    | File folder          |          |
| negative_metab_se_cfm  | 8/3/2021 3:24 PM    | File folder          |          |
| cfm-annotate.exe       | 11/16/2016 11:13 PM | Application          | 1,914 KB |
| cfm-id.exe             | 11/16/2016 11:13 PM | Application          | 1,914 KB |
| cfm-id-precomputed.exe | 11/16/2016 11:13 PM | Application          | 750 KB   |
| cfm-predict.exe        | 11/16/2016 11:13 PM | Application          | 1,912 KB |
| cfm-train.exe          | 11/16/2016 11:13 PM | Application          | 2,088 KB |
| compute-stats.exe      | 11/16/2016 11:13 PM | Application          | 1,593 KB |
| fraggraph-gen.exe      | 11/16/2016 11:13 PM | Application          | 1,819 KB |
| ISOTOPE.DAT            | 1/3/2016 2:06 PM    | DAT File             | 7 KB     |
| lpsolve55.dll          | 9/22/2016 8:41 PM   | Application exten... | 380 KB   |

## Note:

- The prediction model is required for CFM-ID. Users can train their own model or directly use the pre-trained model. The predicted model can be downloaded at [here](https://sourceforge.net/p/cfm-id/code/HEAD/tree/supplementary_material/trained_models/esi_msms_models/) (https://sourceforge.net/p/cfm-id/code/HEAD/tree/supplementary\_material/trained\_models/esi\_msms\_models/).

### 3.2 Load required packages, and setting the working directory.

Similar with MetFrag, we use MetDNA2InSilicoTool to call CFM-ID. Please set the working directory at 07\_insilico\_msms, which is localized at KGMN result folder. Then, load some required packages.

```
# set working directory
setwd('G:/00_projects/03_MetDNA2/00_data/20220609_insilico_ms2_demo/NIST_urine_pos/07_insilico_msms/')

# load packages
library(dplyr)
library(MetDNA2InSilicoTool)

# reformat identification_table
reformatTable1(dir_path =
'G:/00_projects/03_MetDNA2/00_data/20220609_insilico_ms2_demo/NIST_urine_pos/07_insilico_msms/')
```

### 3.2 Generate input files for your interested peak.

**This step is consistent with MetFrag.** We use an interesting peak M196T420 as example.

```
# generate files for in-silico MS/MS match
# peak 'M196T420' as example
generateFiles4InsilicoMsMs(peak_id = 'M196T420',
                           dir_path =
'G:/00_projects/03_MetDNA2/00_data/20220609_insilico_ms2_demo/NIST_urine_pos/07_insilico_msms/')
```

### 3.3 Run CFM-ID.

```
# run CFM-ID

# parameters
# cfmid_path: path of cfm-id
# config_file: config file of prediction model. It should be selected according to ionzation polairty.
Pos: metab_se_cfm/param_config.txt; Neg: negative_metab_se_cfm/param_config.txt
# param_file: parameter file of prediction model. It should be selected according to ionzation
polairty. Pos: metab_se_cfm/param_output0.log; Neg: negative_metab_se_cfm/param_output0.log
# score_type: rank score of CFM-ID. Default: 'jaccard'
# ppm: relative mz tolerance
# mzabs: absolute mz tolerance

runCfmIdMatch(peak_id = 'M196T420',
              dir_path =
'G:/00_projects/03_MetDNA2/00_data/20220609_insilico_ms2_demo/NIST_urine_pos/07_insilico_
msms/',
              cfmid_path = 'F:/software/cfm_id/cfm-id.exe',
              config_file = 'F:/software/cfm_id/metab_se_cfm/param_config.txt',
              param_file = 'F:/software/cfm_id/metab_se_cfm/param_output0.log',
              score_type = 'Jaccard',
              ppm = 25,
              mzabs = 0.01)
```

### 3.4 Output of CFM-ID.

A folder “02\_cfmid” will be created in the “M196T420” folder. It contains results of CFM-ID. The “cfmid\_result.txt” is the CFM-ID rank result. The “cfmid\_pred\_spec.msp” is the predicted MS/MS spectra of candidates.

00\_projects > 03\_MetDNA2 > 00\_data > 20220609\_insilico\_ms2\_demo > NIST\_urine\_pos > 07\_insilico\_msms > M196T420 >

| Name               | Date modified      | Type                 | Size |
|--------------------|--------------------|----------------------|------|
| 01_metfrag         | 6/10/2022 12:23 PM | File folder          |      |
| 02_cfmid           | 6/10/2022 1:07 PM  | File folder          |      |
| candidate_list     | 6/10/2022 12:40 PM | File                 | 1 KB |
| candidate_list.csv | 6/10/2022 12:40 PM | Microsoft Excel C... | 2 KB |
| ms2                | 6/10/2022 12:40 PM | File                 | 1 KB |
| ms2.mgf            | 6/10/2022 12:40 PM | MGF File             | 1 KB |

> 00\_projects > 03\_MetDNA2 > 00\_data > 20220609\_insilico\_ms2\_demo > NIST\_urine\_pos > 07\_insilico\_msms > M196T420 > 02\_cfmid

| Name                | Date modified     | Type                  | Size |
|---------------------|-------------------|-----------------------|------|
| candidate_list.txt  | 6/10/2022 1:07 PM | Text Document         | 1 KB |
| cfmid_pred_spec.msp | 6/10/2022 1:07 PM | Windows Installer ... | 9 KB |
| cfmid_result.txt    | 6/10/2022 1:07 PM | Text Document         | 1 KB |
| peak_list.txt       | 6/10/2022 1:07 PM | Text Document         | 1 KB |

## 4. MS-FINDER

MS-FINDER is a rule-based fragmentation tool, which developed by *Prof. Hiroshi Tsugawa* and *Prof. Masanori Arita* Lab. It usually is combined with MS-DIAL. In this tutorial, we mainly used it command tool (version 3.2.4) to evaluate KGMN metabolites.

### 4.1 Download MS-FINDER program.

We used the MS-FINDER v3.24. The newest version can be downloaded from [here](#).

**Note:** The instruction of MetDNA2InSilicoTool is only supported and tested in Windows System.

software > MSFINDER > MSFINDER\_ver\_3.24

| Name                          | Date modified      | Type                  | Size     |
|-------------------------------|--------------------|-----------------------|----------|
| IKVM.OpenJDK.Text.dll         | 1/15/2015 3:02 PM  | Application exten...  | 801 KB   |
| IKVM.OpenJDK.Util.dll         | 1/15/2015 3:02 PM  | Application exten...  | 1,950 KB |
| IKVM.OpenJDK.XML.API.dll      | 1/15/2015 3:02 PM  | Application exten...  | 201 KB   |
| IKVM.OpenJDK.XML.Parse.dll    | 1/15/2015 3:02 PM  | Application exten...  | 2,619 KB |
| IKVM.Runtime.dll              | 1/15/2015 3:02 PM  | Application exten...  | 1,016 KB |
| IKVM.Runtime.JNI.dll          | 1/15/2015 3:02 PM  | Application exten...  | 76 KB    |
| IsotopeRatioCalculator.dll    | 6/2/2019 5:13 PM   | Application exten...  | 32 KB    |
| MassLynxRaw.dll               | 5/10/2018 10:39 AM | Application exten...  | 738 KB   |
| MassLynxRawSDK.dll            | 5/10/2018 10:39 AM | Application exten...  | 24 KB    |
| MassSpectrogram.dll           | 6/10/2019 5:04 PM  | Application exten...  | 97 KB    |
| MassSpectrogram.dll.config    | 9/20/2018 11:43 AM | CONFIG File           | 4 KB     |
| Mathematics.dll               | 5/5/2016 12:04 PM  | Application exten...  | 24 KB    |
| MessagePack.dll               | 1/30/2018 3:19 PM  | Application exten...  | 273 KB   |
| MolecularFormulaFinder.dll    | 6/10/2019 5:02 PM  | Application exten...  | 135 KB   |
| MsdialGcmsProcess.dll         | 6/10/2019 5:03 PM  | Application exten...  | 156 KB   |
| MsdialLcmsProcess.dll         | 6/10/2019 5:03 PM  | Application exten...  | 324 KB   |
| MSFINDER.exe                  | 6/10/2019 5:04 PM  | Application           | 1,235 KB |
| MSFINDER.exe.config           | 9/20/2018 11:43 AM | CONFIG File           | 4 KB     |
| MSFINDER.INI                  | 5/28/2019 11:57 AM | Configuration sett... | 3 KB     |
| MsfinderCommon.dll            | 6/10/2019 5:04 PM  | Application exten...  | 54 KB    |
| MsfinderConsoleApp.exe        | 6/10/2019 5:02 PM  | Application           | 194 KB   |
| MsfinderConsoleApp.exe.config | 11/21/2018 5:36 PM | CONFIG File           | 4 KB     |

#### 4.2 Load required packages, and setting the working directory.

Repeat procedures in MetFrag and CFIM-ID. Set the working directory at 07\_insilico\_msms, which is localized at KGMN result folder. Then, load some required packages.

```
# set working directory
```

```
setwd('G:/00_projects/03_MetDNA2/00_data/20220609_insilico_ms2_demo/NIST_urine_pos/07_in  
silico_msms/')
```

```
# load packages
```

```
library(dplyr)
```

```
library(MetDNA2InSilicoTool)
```

```
# reformat identification_table
```

```
reformatTable1(dir_path =
```

```
'G:/00_projects/03_MetDNA2/00_data/20220609_insilico_ms2_demo/NIST_urine_pos/07_insilico_  
msms/')
```

#### 4.3 Generate input files for your interested peak.

Consist with **MetFrag** and **CFM-ID**, generate related files for targeted peaks. The example M196T420 is here.

```
# generate files for in-silico MS/MS match
# peak 'M196T420' as example
generateFiles4InsilicoMsMs(peak_id = 'M196T420',
                           dir_path =
'G:/00_projects/03_MetDNA2/00_data/20220609_insilico_ms2_demo/NIST_urine_pos/07_insilico_
msms/')
```

#### 4.4 Run MS-FINDER

We provided a R function (runMsFinderMatch) to call MS-FINDER. Here, we use the command tool of MS-FINDER (MsfinderConsoleApp.exe). The path of MS-FINDER should be given.

```
# run MS-FINDER

# parameters
#
runMsFinderMatch(peak_id = 'M196T420',
                 dir_path =
'G:/00_projects/03_MetDNA2/00_data/20220609_insilico_ms2_demo/NIST_urine_pos/07_insilico_
msms',
                 msfinder_path =
'F:/software/MSFINDER/MSFINDER_ver_3.24/MsfinderConsoleApp.exe')
```

#### 4.5 Output of MS-FINDER.

A folder "03\_msfinder" will be created in the "M196T420" folder. It contains results of MS-FINDER. The result of MS-FINDER is organized as adduct types. The rank result will be 03\_msfinder -> [M+H]<sup>+</sup> -> result -> Structure result-2055.txt.



00\_projects > 03\_MetDNA2 > 10\_project > MetDNA2\_project > Data > 20220608\_biological\_samples > NIST\_urine\_pos > 07\_insilico\_msms > M196T420

| Name               | Date modified     | Type                 | Size |
|--------------------|-------------------|----------------------|------|
| 01_metfrag         | 6/9/2022 11:07 AM | File folder          |      |
| 02_cfmid           | 6/9/2022 12:26 PM | File folder          |      |
| 03_msfinder        | 6/9/2022 1:05 PM  | File folder          |      |
| candidate_list     | 6/9/2022 9:25 AM  | File                 | 1 KB |
| candidate_list.csv | 6/9/2022 9:25 AM  | Microsoft Excel C... | 2 KB |
| ms2                | 6/9/2022 9:25 AM  | File                 | 1 KB |
| ms2.mgf            | 6/9/2022 9:25 AM  | MGF File             | 1 KB |

00\_projects > 03\_MetDNA2 > 10\_project > MetDNA2\_project > Data > 20220608\_biological\_samples > NIST\_urine\_pos > 07\_insilico\_msms > M196T420 > 03\_msfinder >

| Name                | Date modified    | Type               | Size |
|---------------------|------------------|--------------------|------|
| [M+H] <sup>+</sup>  | 6/9/2022 1:06 PM | File folder        |      |
| [M+Na] <sup>+</sup> | 6/9/2022 1:06 PM | File folder        |      |
| M196T420_script.bat | 6/9/2022 1:05 PM | Windows Batch File | 2 KB |

00\_projects > 03\_MetDNA2 > 10\_project > MetDNA2\_project > Data > 20220608\_biological\_samples > NIST\_urine\_pos > 07\_insilico\_msms > M196T420 > 03\_msfinder > [M+H]<sup>+</sup> >

| Name                                  | Date modified    | Type                  | Size  |
|---------------------------------------|------------------|-----------------------|-------|
| [M+H] <sup>+</sup>                    | 6/9/2022 1:06 PM | File folder           |       |
| result                                | 6/9/2022 1:06 PM | File folder           |       |
| [M+H] <sup>+</sup> .fgt               | 6/9/2022 1:06 PM | FGT File              | 37 KB |
| [M+H] <sup>+</sup> .msp               | 6/9/2022 1:05 PM | Windows Installer ... | 1 KB  |
| M196T420_db.txt                       | 6/9/2022 1:05 PM | Text Document         | 1 KB  |
| MsfinderConsoleApp-Param-M196T420.txt | 6/9/2022 1:05 PM | Text Document         | 2 KB  |

00\_projects > 03\_MetDNA2 > 10\_project > MetDNA2\_project > Data > 20220608\_biological\_samples > NIST\_urine\_pos > 0:

| Name                      | Date modified    | Type          | Size |
|---------------------------|------------------|---------------|------|
| Formula result-2055.txt   | 6/9/2022 1:06 PM | Text Document | 4 KB |
| Structure result-2055.txt | 6/9/2022 1:06 PM | Text Document | 3 KB |

**Note:**

- The parameter file of MS-FINDER is in '03\_msfinder/[M+H]<sup>+</sup>/MsfinderConsoleApp-param.txt'. Advanced users can adjust this file, and rerun MS-FINDER.

## 5. The script for connection KGMN and in-silico MS/MS tools

Here is a script contains above codes to help to connect KGMN and in-silico MS/MS tools quickly.

```
# set working directory
setwd('G:/00_projects/03_MetDNA2/00_data/20220609_insilico_ms2_demo/NIST_urine_pos/')

# load packages
library(dplyr)
library(MetDNA2InSilicoTool)

# copy files
copyFiles4InsilicoTool(dir_path = '.')

# set working directory
setwd('G:/00_projects/03_MetDNA2/00_data/20220609_insilico_ms2_demo/NIST_urine_pos/07_in
silico_msms/')

# reformat identification_table
reformatTable1(dir_path = '.')

# generate files for in-silico MS/MS match
# peak 'M196T420' as example
generateFiles4InsilicoMsMs(peak_id = 'M196T420')

# run MetFrag
runMetFragMatch(peak_id = 'M196T420',
                metfrag_path = 'F:/software/metfrag/MetFrag2.4.5-CL.jar',
                ppm = 25,
                mzabs = 0.01,
                frag_ppm = 25)

# run CFM-ID
runCfmIdMatch(peak_id = 'M196T420',
              cfmid_path = 'F:/software/cfm_id/cfm-id.exe',
```

```
config_file = 'F:/software/cfm_id/metab_se_cfm/param_config.txt',
param_file = 'F:/software/cfm_id/metab_se_cfm/param_output0.log',
score_type = 'Jaccard',
ppm = 25,
mzabs = 0.01)

# run MS-FINDER
# note: the dir_path must be given
runMsFinderMatch(peak_id = 'M196T420',
dir_path =
'G:/00_projects/03_MetDNA2/00_data/20220609_insilico_ms2_demo/NIST_urine_pos/07_insilico_
msms',
msfinder_path =
'F:/software/MSFINDER/MSFINDER_ver_3.24/MsfinderConsoleApp.exe')
```

### Supplementary References:

1. Wang, M. et al. Mass spectrometry searches using MASST. *Nat. Biotechnol.* **38**, 23–26 (2020).
2. Ruttkies, C., Schymanski, E. L., Wolf, S., Hollender, J. & Neumann, S. MetFrag relaunched: incorporating strategies beyond in silico fragmentation. *J. Cheminform.* **8**, 3 (2016).
3. Wang, F. et al. CFM-ID 4.0: More Accurate ESI-MS/MS Spectral Prediction and Compound Identification. *Anal. Chem.* **93**, 11692-11700 (2021).
4. Tsugawa, H. et al. Hydrogen Rearrangement Rules: Computational MS/MS Fragmentation and Structure Elucidation Using MS-FINDER Software. *Anal. Chem.* **88**, 7946–7958 (2016).
